1 Systems biology reveals NR2F6 and TGFB1 as key regulators of feed efficiency in beef  
2 cattle

3

4 Pâmela A. Alexandre<sup>1,2</sup>; Marina Naval-Sanchez<sup>2</sup>; Laercio R. Porto-Neto<sup>2</sup>; José Bento S.  
5 Ferraz<sup>1</sup>; Antonio Reverter<sup>2</sup> and Heidge Fukumasu<sup>1§</sup>

6

7 <sup>1</sup>Department of Veterinary Medicine, College of Animal Sciences and Food Engineering,  
8 University of São Paulo, Av. Duque de Caxias Norte 225, Pirassununga, 13635-900, Brazil

9 <sup>2</sup>Commonwealth Scientific and Industrial Research Organisation (CSIRO), Agriculture &  
10 Food, 306 Carmody Road, St. Lucia, 4067, QLD, Australia

11

12 §corresponding author

13 Heidge Fukumasu, DVM, PhD, Associate Professor

14 Phone: 55-19-35656864

15 Fax: 55-19-3565

16 e-mail: [fukumasu@usp.br](mailto:fukumasu@usp.br)

17

18

19

20

21

22

23

24

25

26

## Abstract

27

28 Systems biology approaches are used as strategy to uncover tissue-specific perturbations and  
29 regulatory genes related to complex phenotypes. We applied this approach to study feed  
30 efficiency (FE) in beef cattle, an important trait both economically and environmentally.  
31 Poly-A selected RNA of five tissues (adrenal gland, hypothalamus, liver, skeletal muscle and  
32 pituitary) of eighteen young bulls, selected for high and low FE, were sequenced (100bp,  
33 paired-end). From the 17,354 expressed genes, 1,317 were prioritized by five selection  
34 categories (differentially expressed, harbouring SNPs associated with FE, tissue-specific,  
35 secreted in plasma and key regulators) and used for network construction. NR2F6 and TGFB  
36 were identified and validated by motif discovery as key regulators of hepatic inflammatory  
37 response and muscle tissue development, respectively, two biological processes demonstrated  
38 to be associated to FE. Moreover, we indicated potential biomarkers of FE which are related  
39 to hormonal control of metabolism and sexual maturity. By using robust methodologies and  
40 validation strategies, we confirmed main biological processes related to FE in *Bos indicus*  
41 and indicated candidate genes as regulators or biomarkers of superior animals.

42

43 Keywords: *Bos indicus*/co-expression/motif discovery/inflammation/residual feed intake

44

45

## 46 **Introduction**

47           Since the domestication of the first species, animal selection aims to meet human  
48 needs and their changes over time. The current main selection goals in livestock production  
49 are increase of productivity, reduction of the environmental impact and reduction of  
50 competition for grains with human nutrition (Hayes *et al*, 2013). Thus, feed efficiency (FE)  
51 has become a relevant trait of study, as animals considered of high feed efficiency are those  
52 presenting reduced feed intake and lower production of methane and manure without  
53 compromising animal's weight gain (Gerber *et al*, 2013). However, the incorporation of FE  
54 as selection criteria in animal breeding programs is costly and time consuming. Daily feed  
55 intake and weight gain for a large number of animals need to be recorded for at least 70 days  
56 to obtain accurate estimates of FE (Archer *et al*, 1997).

57           In the past years, several studies have been carried out with the aim to identify  
58 molecular markers associated with FE to enable the faster and cost-effectively identification  
59 of superior animals (de Oliveira *et al*, 2014; Rolf *et al*, 2011; Santana *et al*, 2014; Seabury *et al*,  
60 *et al*, 2017). However, for each population, different biological processes seem to be identified  
61 (de Oliveira *et al*, 2014; Rolf *et al*, 2011; Santana *et al*, 2014; Seabury *et al*, 2017). Probably,  
62 that is because FE is a multifactorial trait and many different biological mechanisms seems to  
63 be involved in its regulation (Herd *et al*, 2004; Herd & Arthur, 2009). It has been indicated  
64 that high FE animals present increased mitochondrial function (Lancaster *et al*, 2014; Connor  
65 *et al*, 2010), less oxygen consumption (Gonano *et al*, 2014) and delayed puberty (Randel &  
66 Welsh, 2013; Shaffer *et al*, 2011; Fontoura *et al*, 2016). On the other hand, low FE animals  
67 have increased physical activity, ingestion frequency and stress (Francisco *et al*, 2015; Cafe  
68 *et al*, 2011; Kelly *et al*, 2010; Chen *et al*, 2014), increased leptin and cholesterol levels  
69 (Alexandre *et al*, 2015; Foote *et al*, 2016; Nkrumah *et al*, 2007; Mota *et al*, 2017), higher  
70 subcutaneous and visceral fat (Santana *et al*, 2012; Gomes *et al*, 2012; Mader *et al*, 2009),

71 higher energy wastage as heat (Montanholi *et al*, 2010, 2009; Archer *et al*, 1999) and more  
72 hepatic lesions associated with inflammatory response (Alexandre *et al*, 2015; Paradis *et al*,  
73 2015).

74 In the context of such a complex trait, we perform a multiple-tissue transcriptomic  
75 analyses of high and low FE Nellore cattle across tissues related to endocrine control of  
76 hunger/satiety, hydric and energy homeostasis, stress and immune response, physical and  
77 sexual activity, as is the case of hypothalamus-pituitary-adrenal axis and organs as liver and  
78 skeletal muscle. Based on gene co-expression across tissues and conditions we derived a  
79 regulatory network revealing NR2F6 and TGFB signalling as key regulators of hepatic  
80 inflammatory response and muscle tissue development, respectively. Next, we apply  
81 advanced motif discovery methods which i) validate that co-expressed genes are enriched for  
82 NR2F6 and TGFB signalling effector molecule SMAD3 binding sites in their 10KB upstream  
83 regions and ii) predict direct transcription factor (TF) – Target gene (TG) interactions at the  
84 sequence level. These binding interactions were experimentally validated with public TF  
85 ChIP-seq from ENCODE. Regulatory activity in the tissues of interest was also confirmed by  
86 performing an enrichment analysis on open chromatin tracks and histone chromatin marks  
87 across cell types and tissues in the human and cow genome. Moreover, we propose a  
88 hormonal control of differences in metabolism and sexual maturity between high and low FE  
89 animals, indicating potential biomarkers for further validation such as adrenomedullin, FSH,  
90 oxytocin, somatostatin and TSH.

91

## 92 **Results**

### 93 **Multi-tissue transcriptomic data reveal differences between high and low feed efficient** 94 **animals**

95 Feed efficiency is a complex trait characterized by multiple distinct biological  
96 processes including metabolism, ingestion, digestion, physical activity and thermoregulation  
97 (Herd *et al*, 2004; Herd & Arthur, 2009). To study FE at transcriptional level we performed  
98 RNAseq of five tissues (i.e. adrenal gland, hypothalamus, liver, muscle and pituitary) from  
99 nine male bovines of high feed efficiency (HFE, characterized by low residual feed intake  
100 (RFI) (Koch *et al*, 1963)) and nine of low FE (LFE, characterized by high RFI). In total, we  
101 analysed 18 samples of liver, hypothalamus and pituitary; 17 of muscle and 15 of adrenal  
102 gland, yielding 13 million reads per sample on average (S1 Supporting Information). Gene  
103 expression was estimated for 24,616 genes present in the reference genome (UMD 3.1) and  
104 after quality control (refer to methods), 17,354 genes were identified as being expressed in at  
105 least one of the five tissues analysed.

106 Differential expression (DE) analysis between high and low FE animals resulted in  
107 471 DE genes across tissues ( $P < 0.001$ , S2 Supporting Information), namely, 111 in adrenal  
108 gland, 125 in hypothalamus, 91 in liver, 104 in muscle and 98 in pituitary (S3A-E Supporting  
109 Information). Although no significant functional enrichment was found for the 281 genes up-  
110 regulated in high feed efficiency, the 248 genes down-regulated presented a significant  
111 enrichment of GO terms such as response to hormone ( $\text{P}_{\text{adj}} = 5.43 \times 10^{-6}$ ), regulation of  
112 hormone levels ( $\text{P}_{\text{adj}} = 3.48 \times 10^{-6}$ ), cell communication ( $\text{P}_{\text{adj}} = 3.18 \times 10^{-4}$ ), regulation of  
113 signaling receptor activity ( $\text{P}_{\text{adj}} = 3.20 \times 10^{-4}$ ), hormone metabolic process ( $\text{P}_{\text{adj}} = 5.86 \times 10^{-4}$ ),  
114 response to corticosteroid ( $\text{P}_{\text{adj}} = 6.28 \times 10^{-4}$ ), regulation of secretion ( $\text{P}_{\text{adj}} = 7.2 \times 10^{-4}$ ),  
115 response to lipopolysaccharide ( $\text{P}_{\text{adj}} = 7.9 \times 10^{-4}$ ) and regulation of cell proliferation  
116 ( $\text{P}_{\text{adj}} = 1.86 \times 10^{-3}$ ). Refer to S4 Supporting Information to see all enriched terms.

117

118 **Overlap between gene selection criteria prioritizes genes associated with feed efficiency**

119           The genetic architecture behind complex traits involves a large variety of genes with  
120 coordinated expression pattern, which can be represented by gene regulatory networks as a  
121 blueprint to study their relationships and to identify central regulatory genes (Swami, 2009).  
122 Therefore, it is important to select relevant genes and gene families according to the  
123 phenotype of interest to be used for network analysis. We defined five categories of genes  
124 (see methods for further information) for inclusion in co-expression analysis: 1 -  
125 differentially expressed (DE), 2 - genes harbouring SNPs previously associated with FE  
126 (harbouring SNP), 3 - tissue specific (TS), 4 - genes coding proteins secreted in plasma by  
127 any of the five tissues analysed (secreted) and 5 - key regulators.

128           As reported before, we have identified 471 DE genes between high and low FE  
129 animals (Figure 1A, S5A Supporting Information). In addition, 267 genes were selected for  
130 harbouring SNPs previously associated with FE, as not only differences in expression levels  
131 can influence the phenotype but also polymorphism in the DNA sequence that can alter the  
132 translated protein behaviour (S5B Supporting Information). Moreover, 396 were selected for  
133 being tissue specific (refer to methods for definition); 22 in adrenal gland, 32 in  
134 hypothalamus, 215 in liver, 218 in muscle and 9 in pituitary (S5C Supporting Information). A  
135 total of 244 genes coding proteins secreted in plasma were selected because of their potential  
136 as biomarkers of FE (S5D Supporting Information). From those, 135 had liver as the tissue of  
137 maximum expression and were functionally enriched for GO terms such as complement  
138 activation ( $\text{Padj}=1.82 \times 10^{-19}$ ), regulation of acute inflammatory response ( $\text{Padj}=1.89 \times 10^{-14}$ ),  
139 innate immune response ( $\text{Padj}=9.71 \times 10^{-12}$ ), negative regulation of endopeptidase activity  
140 ( $\text{Padj}=2.35 \times 10^{-10}$ ), platelet degranulation ( $\text{Padj}=1.08 \times 10^{-10}$ ), regulation of coagulation  
141 ( $\text{Padj}=3.39 \times 10^{-9}$ ), triglyceride homeostasis ( $\text{Padj}=1.23 \times 10^{-6}$ ), cholesterol efflux  
142 ( $\text{Padj}=1.03\text{E}^{-5}$ ) (S6 Supporting Information). Finally, from 1570 potential regulators in public  
143 available TFdb, 78 were identified as key regulators of the genes selected by all the other

144 categories, i.e. 78 genes presented a coordinated expression level with many of the genes in  
145 the network reflecting a tight control of expression pattern across tissues (S5E Supporting  
146 Information).

147 Considering all the inclusion criteria, 1,317 genes were selected to be included in co-  
148 expression network analysis (Figure 1B, S7 Supporting Information), some of them selected  
149 by more than one category (Figure 1C). Regarding DE genes, six of them were also reported  
150 before as harbouring SNPs associated with the phenotype (*LUZP2*, *MAOB*, *SFRS5*,  
151 *SLC24A2*, *SOCS3* and *WIFI1*) and 13 of them were key regulators (*HOPX*, *PITX1*, *CRYM*,  
152 *PLCD1*, *ND6*, *cytb*, *ND1*, *MT-ND4L*, *ND5*, *ATP8*, *ND4*, *ENSBTAG00000046711* and  
153 *ENSBTAG00000048135*). Many of the genes that are both DE and regulators are involved in  
154 respiratory chain (*ND6*, *cytb*, *ND1*, *MT-ND4L*, *ND5*, *ATP8* and *ND4*) and were all up-  
155 regulated in high FE group.

156 Considering both DE and secreted genes, 18 were identified (*NOV*, *SPPI*, *CTGF*,  
157 *OXT*, *PTX3*, *VGF*, *CCL21*, *COLIA2*, *PGF*, *SOD3*, *SERPINE1*, *PRL*, *PON1*, *SST*, *JCHAIN*,  
158 *PCOLCE*, *IGFBP6* and *SCG2*). In addition, four genes were DE, secreted and tissue specific,  
159 two from liver (*CXCL3* and *IGFBP1*) and two from pituitary (*NPY* and *CYP17A1*). Genes  
160 *RARRES2* and *PENK* (proenkephalin) were DE, secreted and had been previously reported as  
161 harbouring SNP associated with FE [30, AnimalQTLdb]. Other DE genes worthy to  
162 highlight, due to their well-known role in metabolic processes, are *AMH* (anti-mullerian  
163 hormone), *TSHB* (thyroid stimulating hormone beta), *FGF21* (Fibroblast growth factor 21)  
164 and *FST* (follistatin), up-regulated in high FE group, and *PMCH* (pro-melanin concentrating  
165 hormone), *ADM* (adrenomedullin) and *FSHB* (follicle stimulating hormone beta), up-  
166 regulated in low FE group.

167

168

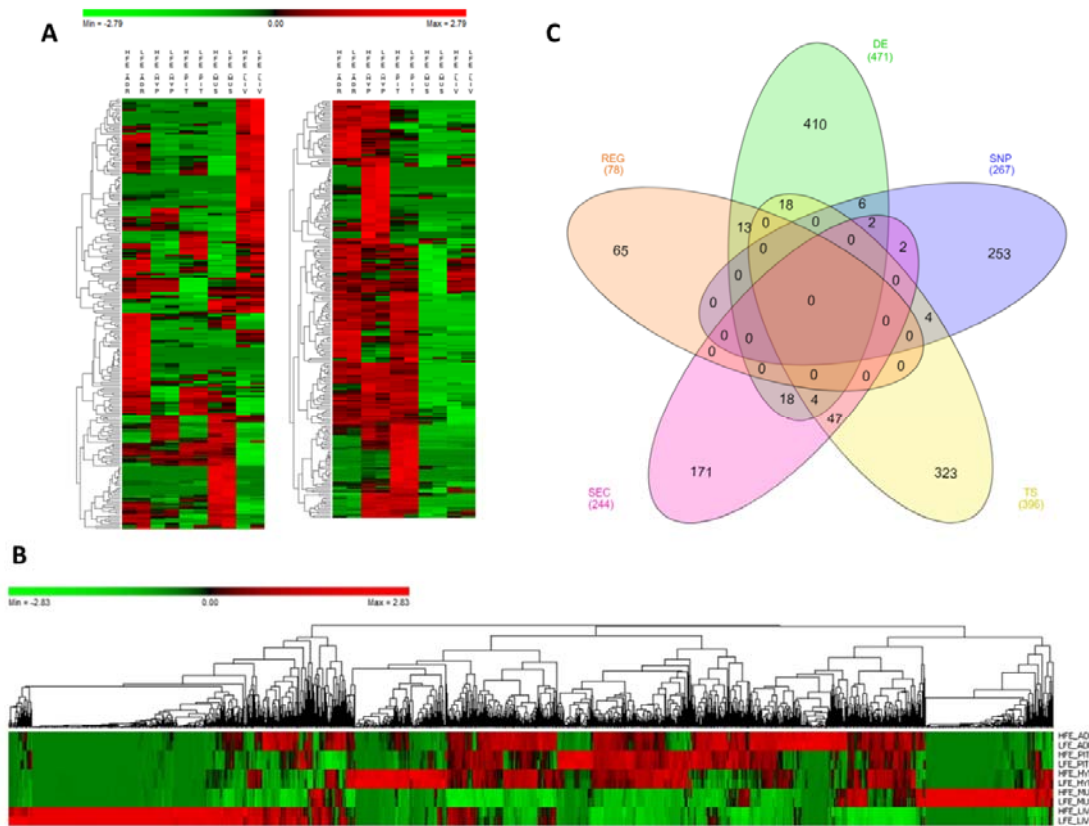

169

170 **Figure 1. Genes selected for co-expression network construction.** A) Heatmap of  
171 normalized mean expression (NME) of 471 differentially expressed (DE) genes between high  
172 (HFE) and low (LFE) feed efficient animals in adrenal gland (ADR), hypothalamus (HYP),  
173 liver (LIV), muscle (MUS) and pituitary (PIT). Genes (rows) and samples (columns) are  
174 organized by hierarchical clustering based on Euclidean distances. B) NME heatmap of all  
175 1,317 genes selected for network construction. Genes (columns) and samples (rows) are  
176 organized by hierarchical clustering based on Euclidean distances. C) Venn diagram of 1,317  
177 genes selected for network construction. The inclusion criteria for selecting genes were  
178 divided in five categories: differentially expressed genes (DE), tissue specific genes (TS),  
179 genes harbouring SNPs reported by literature as being associated with feed efficiency in beef  
180 cattle (SNP), genes encoding proteins secreted by at least one of the tissues in plasma (SEC)  
181 and key regulators (REG). Numbers between brackets indicate the total number of genes in  
182 each category.

183

184 **Co-expression network reveals regulatory genes and biological processes related to feed**  
185 **efficiency**

186 The co-expression network (Figure 2) was composed by 1,317 genes and 91,932  
187 connections, with a mean of 70 connections per gene. Most of the connections (51%)  
188 involved a DE gene and 23% of those were between two DE genes. Tissue specific (TS) gene



189 were involved in 49% of the connections with 119 connections per gene in average, which  
190 was higher than the overall network mean and reflects the close relationship between genes  
191 involved in tissue specific functions. Key regulators was the least represented category in the  
192 network (only 78 genes) but accounted for 11% of the connections in the network with the  
193 highest value of mean connections per gene, 131 connections, which is in accordance with  
194 their regulatory role. Regarding the connections within tissues, when we ranked all the genes  
195 in the network by the number of connections and looked at the top 50 genes, 29 were from  
196 liver, 15 were from muscle and 3, 2 and 1 were from pituitary, adrenal gland and  
197 hypothalamus, respectively. This result indicates a very well-coordinated expression pattern  
198 in liver and muscle that could be a reflex of the number of TS genes in those tissues and the  
199 presence of central regulatory genes coordinating the expression of many other genes.

200 In the network (Figure 2), genes grouped together by tissue which was mostly driven  
201 by TS genes. As mentioned before, most of the secreted proteins coding genes were locate in  
202 the liver. Most of the key regulators were located peripherally in relation to the clusters which  
203 could be reflecting their regulatory nature independent of tissue specificity. Despite that,  
204 some regulators draw attention because of their high number of connections.

205 The top five most connected regulators were *EPC1*, *NR2F6*, *MED21*,  
206 *ENSBTAG0000031687* and *CTBP1*, varying from 317 to 284 connections. They were all  
207 first neighbours of each other and were connected mainly to genes with higher expression in  
208 liver and essentially enriched for acute inflammatory response ( $P_{adj}=4.5 \times 10^{-13}$ , S8  
209 Supporting Information). The next most connected regulator is *TGFBI* with 217 connections.

210 It is mainly connected to genes from muscle that are primarily enriched for muscle organ  
211 development ( $P_{adj}=6.87 \times 10^{-5}$ ) and striated muscle contraction ( $P_{adj}=1.39 \times 10^{-5}$ , S9  
212 Supporting Information). Besides indicating main regulator genes, network approach can be  
213 useful to access the role of specific genes. For instance, gene *FGF21*, a hormone up regulated

214 in liver of high FE animals, is directly connected to genes enriched for plasma lipoprotein  
215 particle remodelling, regulation of lipoprotein oxidation and cholesterol efflux (Padj=5.64E-  
216 3, S10 Supporting Information). Indeed, according to the literature, this gene is associated to  
217 decrease in body weight, blood triglycerides and LDL-cholesterol (Cheung & Deng, 2014).  
218

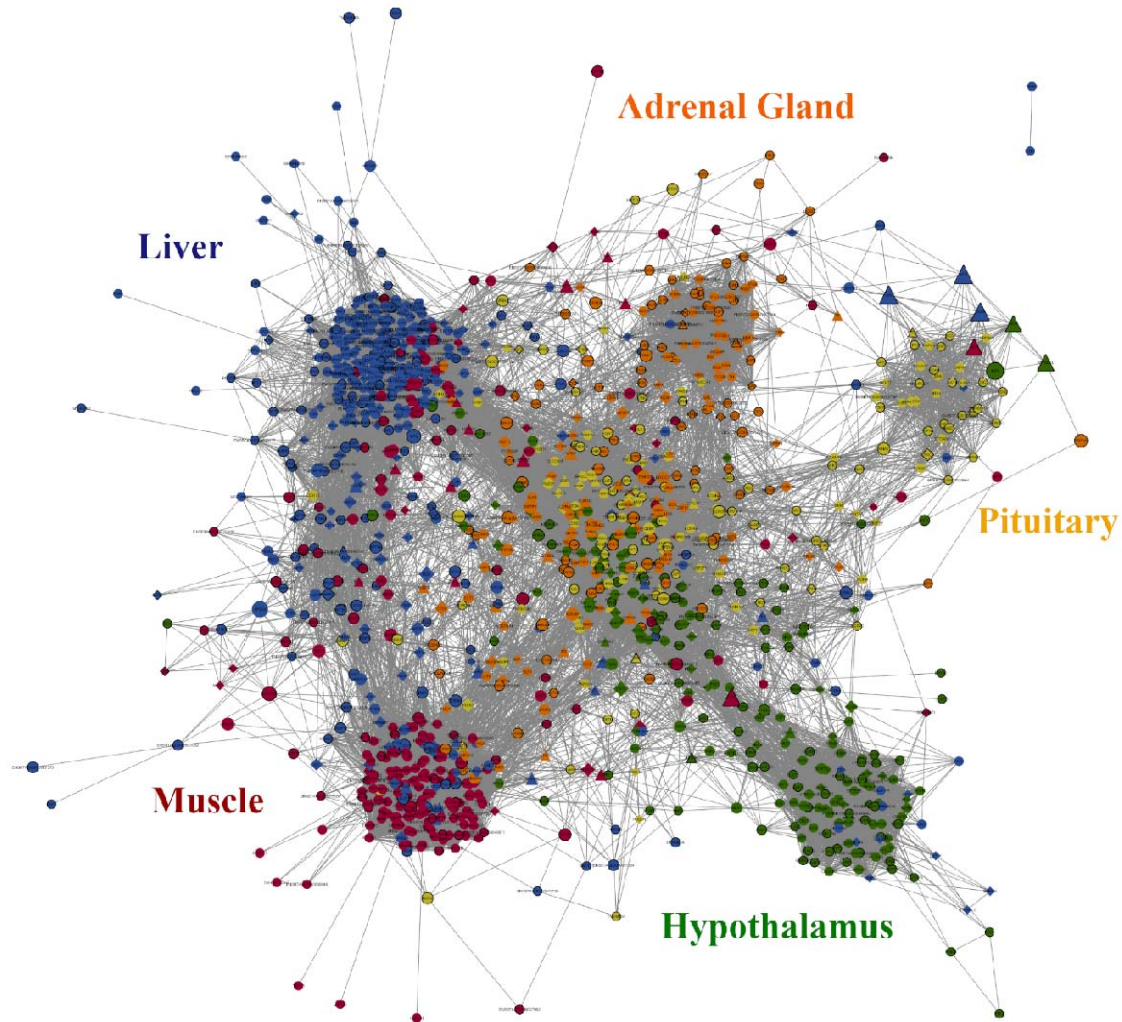

219

220 **Figure 2. Gene co-expression network constructed using PCIT algorithm on 1,317**  
221 **selected genes (see methods).** Nodes with diamond shape correspond to secreted proteins  
222 coding genes and triangles correspond to key regulators; all the other genes are represented  
223 by ellipses. Nodes with black borders are differentially expressed between high and low feed  
224 efficiency. Colours are relative to the tissue of maximum expression: blue represent liver,  
225 red represent muscle, yellow represent pituitary, green represent hypothalamus and orange  
226 represent adrenal gland. The size of the nodules is relative to the normalized mean expression  
227 values in all samples. Only correlations above 0.9 and below -0.9 and its respective genes are  
228 shown in this figure.

229 **Motif discovery confirms NR2F6 as a key regulator of liver transcriptional changes**  
230 **between high and low feed efficiency**

231 By means of the power-law theory, co-expression networks present many nodules  
232 with few connections and few central nodules with many connections (de la Fuente, 2010),  
233 being the last ones indicated as central regulatory genes responsible for the transcriptional  
234 changes between the divergent phenotypes analysed. In our study, the most connected  
235 regulators were indicated, together with their target genes, i.e. their first neighbours in the  
236 network. Those genes are a mixture of direct and indirect regulator targets. In order to  
237 validate the regulatory role of the most connected regulators in the network and identify their  
238 core direct targets we performed motif discovery in their co-expressed target genes. It is  
239 noteworthy motif discovery should confirm the presence of DNA motifs of a TF in the  
240 regulatory regions of co-expressed genes. From the top five most connected regulators from  
241 our previous co-expression analysis, only NR2F6 has the ability to bind DNA. In contrast, the  
242 other four regulators act mainly as cofactors (corepressor, i.e. CTBP1; coactivator, i.e.  
243 MED21; or histones modifier, i.e. EPC1), that is co-binding through protein-protein  
244 interactions.

245 The analysis of 313 co-expressed genes with NR2F6 yield the Nuclear Factor motif  
246 HNF4-NR2F2 (transfac\_pro-M01031) as the second motif most enriched out of 9732 PWMs  
247 with a Normalized Enrichment Score (NES) of 7.99 (Figure 3B). In addition, a total of 19  
248 motifs associated with HNF4-NR2F2 were enriched in the dataset, associating HNF4-NR2F2  
249 to 168 direct target genes (Figure 3C). Due to motif redundancy or highly similarity between  
250 a plethora of TFs, these motifs can be associated with multiple TFs from HNF4 (direct) to  
251 several nuclear factors such as NR2F6 (motif similarity score FDR 1.414E-5). However, our  
252 co-expression analysis strongly indicates NR2F6 is the key TF, since it was the TF with the

253 highest number of nodes in the co-expression network (Figure 3C) and neither HNF4 nor  
254 NR2F2 were prioritized by any selection category to be included in the network.

255 Each of the NR2F6 inferred direct target genes contain one or more predicted  
256 enhancers, i.e. regions with high-scoring motif binding sites for NR2F6 or TFs with highly  
257 similar motifs. To validate the binding of these genomic regions by NR2F6 or TFs with  
258 highly similar motifs to NR2F6 we performed a region enrichment analysis of our predicted  
259 NR2F6 binding sequences against public TF ChIP-seq bound regions in human cell lines  
260 from ENCODE the ENCODE consortium (1394 TF binding site tracks). This analysis,  
261 confirms the experimental binding of TFs with similar binding as NR2F6 in HepG2 cells,  
262 HNF4A (NES=8.57), HNF4G (NES=7.83), RXRA (NES=6.85), and NR2F2 (NES=4.45) as  
263 the most enriched tracks (S11 Supporting Information). Recent NR2F6 ChIP-seq data in  
264 HepG also confirms an enrichment for NR2F6 (Figure 3D), indicating predicted NR2F6  
265 binding regions are experimentally bound by NR2F6 in hepatocyte cell lines (Figure 3D).

266 Next, to validate that the NR2F6 binding in those regions is functional in liver we  
267 performed an enrichment analysis for open-chromatin (tracks=655) and histone modifications  
268 (tracks =2450) related to active regulatory elements (S12 Supporting Information). This  
269 analysis yielded FAIRE-seq on HepG2 cell lines and H3K9ac and H3K4me3 in adult liver  
270 (E066 Roadmap Epigenomics Track) as the most enriched tracks respectively, strongly  
271 indicating not only predicted target enhancers are bound by NR2F6 in Hepatocyte cell lines  
272 but these regulatory regions are functionally active in hepatocytes and human liver (Figure  
273 3D).

274

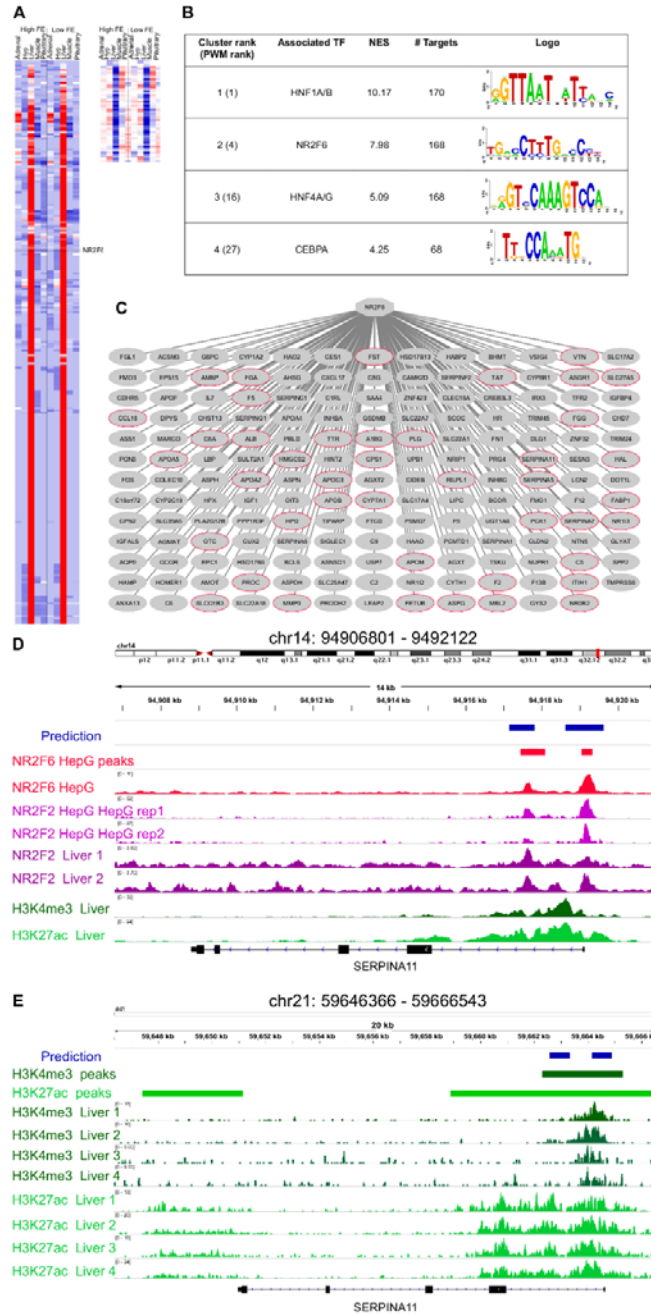

275

276

277 **Figure 3. Mapping of NR2F6 direct targets.** A) Heatmap of the 313 genes coexpressed  
 278 with NR2F6 across all samples (derived from the co-expression analysis), B) i-cisTarget  
 279 motif discovery results on the genes shown in (A), C) Predicted NR2F6 targetome. A red  
 280 node indicates genes known to be targeted by NR2F6 in human Hepatocytes. D) Example of  
 281 predicted NR2F6 target regions for SERPINA1 gene. The predicted enhancer overlaps the  
 282 exact position for NR2F6 and NR2F2 binding in HepG sites from ENCODE dataset as well  
 283 as histone chromatin marks related with active regulatory regions, namely H3K27ac, and  
 284 promoters, H3K4me3 in human primary tissue from RoadMap Epigenetics E) The enhancer  
 285 prediction in cow coordinates (bosTau6) overlaps a region marked with H3K4me3 in cow  
 286 liver (Villar *et al*, 2015).

287           Regarding the cow genome, a recent open-chromatin study (Villar *et al*, 2015) has  
288 delineated the map active promoters and enhancers by H3K4me3 and H3K27ac ChIP-seq in  
289 cow liver resulting in 13796 promoter and 45786 enhancers (S13 Supporting Information).  
290 We performed an enrichment analysis of predicted NR2F6 enhancers converted to cow  
291 coordinates (n=779) resulting in 446 regions being identified as functional regulatory regions  
292 in cow liver. This number is significantly higher compared to only 43 regions are expected to  
293 overlap by random (1000 permutation tests) (Figure 3E).

294           Finally, in addition to NR2F6 motif, HNF1A motif was found as a potential co-  
295 regulator in liver, in particular swissregulon-HNF1A.p2 with a NES =10.17 and in total 20  
296 enriched motifs and 170 direct targets were associated to HNF1A (Figure 3B). HNF1 is a  
297 master regulator of liver gene expression (Tronche & Yaniv, 1992), thus making its finding  
298 justified.

299

300 **Motif discovery validates TGF-beta signalling through Smad3/MyoD1 binding as**  
301 **drivers of transcriptional differences in muscle of divergent feed efficient cattle**

302           The analysis of the 217 genes co-expressed with *TGFBI* (Figure 4A) showed most  
303 target genes motifs were enriched for master regulators of muscle differentiation, namely,  
304 *MEF2* (NES=10.42) a MADS box Transcription factor with 148 target genes, and *MYOD1*  
305 (NES=8.12), a bHLH transcription factor (CANNTG) with 135 direct target genes (Figure  
306 4B, S14 Supporting Information). To evaluate the precision of our predicted *MYOD1* (bHLH)  
307 target genes we assessed how many of these TF-TG relationships had been previously  
308 experimentally reported. Based on *MYOD1* ChIP-seq binding in mouse myotubules, 86 genes  
309 had already been associated with *MYOD1* resulting in 63% success rate (hypergeometric test  
310  $1.72E-22$ ). *SMAD3*, the effector molecule of *TGFBI* signalling is known to recruit *MYOD1* to  
311 drive transcriptional changes during muscle differentiation (Mullen *et al*, 2011). Thus, we

312 evaluated whether predicted *MYOD1* target genes were enriched for known *SMAD3* target  
313 genes resulting in 21 out of 135 *MYOD1* predicted target genes presented *SMAD3* ChIP-seq  
314 binding in myotubes. Thus indicating there is a statistically significant association between  
315 *MYOD1* target genes and *SMAD3* target genes in myotubes (hypergeometric test 1.98 E-6)  
316 (Figure 4 C) (Mullen *et al*, 2011) In contrast, no significant association was found between  
317 predicted *MYOD1* target genes in this study and *SMAD3* target genes in other cell lines, such  
318 as pro-B and ES cell (hypergeometric test 0.056 and 0.076, respectively) (Mullen *et al*,  
319 2011). That is in agreement that the effect of TGF $\beta$  signalling driven by SMAD3 DNA  
320 binding is tissue-specific (Liu *et al*, 2001). Our analysis predicted 621 potential *MYOD1*  
321 binding sites, of which 114 (18%) and 153 (24.5%) present a *MYOD1* ChIP-seq signal in  
322 mouse C2C12 myotubes cells (Mullen *et al*, 2011) and in primary myotubes (Cao *et al*,  
323 2009), respectively.

324 Finally, we evaluate whether predicted MYOD1 binding regions were regulatory  
325 regions active in muscle cells across different species, namely human (S15 Supporting  
326 Information), mouse (S16 and S17 Supporting Information) and cow (S18 Supporting  
327 Information). To tackle this issue we performed an enrichment analysis across 2113 open-  
328 chromatin ENCODE tracks. This analysis resulted in a clear enrichment of our predicted  
329 MYOD1 binding regions with H3K27ac (NES=15.98) and H3K9ac (NES=8.78) regions in  
330 skeletal muscle (Figure 4D). Both chromatin marks are associated with active transcription,  
331 H3K27ac related to active enhancers and H3K9ac related to active gene transcription (Shin *et*  
332 *al*, 2012) thus, validating most of our enhancer predictions in human are active in skeletal  
333 muscle. Once in cow, we assess the overlap of predicted MYOD1 enhancers and promoter  
334 regions in cow muscle experimentally detected with H3K4me3 (Cao *et al*, 2009). This  
335 resulted in 282 regions out of 671 (42 %) overlap when only 11 regions are expected to  
336 overlap by random 1000 permutation test) (Figure 4E).

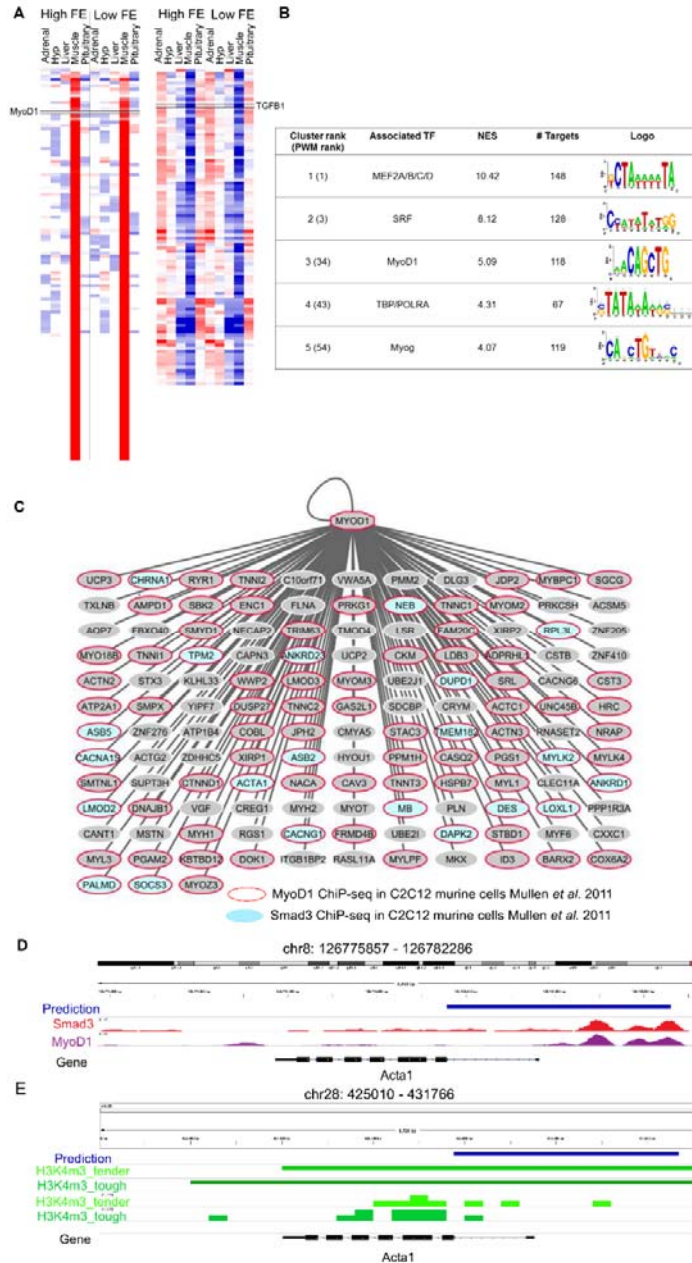

337

338 **Figure 4. Mapping the downstream network of TGFβ signaling through**  
 339 **SMAD3/MyoD1 DNA binding.** A) Heatmap of the 217 genes coexpressed with TGFβ1  
 340 (derived from the co-expression analysis). B) i-cisTarget motif discovery results on the genes  
 341 shown in (A), C) Predicted MyoD targetome. A red node indicate genes know to be targeted  
 342 my MyoD1 in murine myotubes (Mullen *et al.*, 2011). Blue nodes indicate genes to be  
 343 targeted by SMAD3, the effector DNA binding molecular of TGFβ signalling, in murine  
 344 myotubes (Mullen *et al.*, 2011). D) Example of predicted MyoD1 target regions for Acta1  
 345 gene. The predicted enhancer overlaps the exact position for SMAD3 and MyoD1 ChIP-seq  
 346 binding in murine myotubes (Mullen *et al.*, 2011). E) The enhancer prediction in cow  
 347 coordinates (bosTau6) overlaps a promoter region marked with H3K4me3 in muscle tissue in  
 348 cow (Cao *et al.*, 2009).



349 Finally, we evaluate whether predicted MYOD1 binding regions were regulatory  
350 regions active in muscle cells across different species, namely human (S15 Supporting  
351 Information), mouse (S16 and S17 Supporting Information) and cow (S18 Supporting  
352 Information). To tackle this issue we performed an enrichment analysis across 2113 open-  
353 chromatin ENCODE tracks. This analysis resulted in a clear enrichment of our predicted  
354 MYOD1 binding regions with H3K27ac (NES=15.98) and H3K9ac (NES=8.78) regions in  
355 skeletal muscle (Figure 4D). Both chromatin marks are associated with active transcription,  
356 H3K27ac related to active enhancers and H3K9ac related to active gene transcription (Shin *et*  
357 *al*, 2012) thus, validating most of our enhancer predictions in human are active in skeletal  
358 muscle. Once in cow, we assess the overlap of predicted MYOD1 enhancers and promoter  
359 regions in cow muscle experimentally detected with H3K4me3 (Cao *et al*, 2009). This  
360 resulted in 282 regions out of 671 (42 %) overlap when only 11 regions are expected to  
361 overlap by random (1000 permutation test) (Figure 4E).

362

### 363 **Differential co-expression**

364 Although the general co-expression network give us important insights about  
365 regulatory genes and their behaviour, by creating specific networks for high and low FE and  
366 comparing the connectivity of the genes in each one, we can identify genes that change their  
367 behaviour depending on the situation, moving from highly connected to lowly connected and  
368 vice-versa. We were able to identify 87 differentially connected genes between high and low  
369 FE ( $P < 0.05$ ); 63 mainly expressed in liver, 19 in muscle and 3, 1 and 1 in hypothalamus,  
370 adrenal gland and pituitary, respectively (S19 Supporting Information). Those genes were  
371 enriched for terms such as regulation of blood coagulation ( $\text{Padj} = 3.14 \times 10^{-10}$ ), fibrinolysis  
372 ( $\text{Padj} = 7.71 \times 10^{-7}$ ), platelet degranulation ( $\text{Padj} = 7.49 \times 10^{-6}$ ), regulation of peptidase activity  
373 ( $\text{Padj} = 6.16 \times 10^{-4}$ ), antimicrobial humoral response ( $\text{Padj} = 2.49 \times 10^{-3}$ ), acute inflammatory

374 response ( $P_{adj}=2.18 \times 10^{-4}$ ) and induction of bacterial agglutination ( $P_{adj}=3.58 \times 10^{-2}$ ) (S20  
 375 Supporting Information). It is important to highlight 20 of the differentially connected genes  
 376 were also differentially expressed (Table 1) and three of them, i.e. *SST*, *JCHAIN* and  
 377 *IGFBP1*, were secreted in plasma as well, which make them very promising potential  
 378 biomarkers.  
 379

380 **Table 1. Differentially connected and differentially expressed genes between high and**  
 381 **low feed efficiency.**

| Gene name          | Number of connections |                      | Category*   | Tissue of maximum expression | Tissue of differential expression |
|--------------------|-----------------------|----------------------|-------------|------------------------------|-----------------------------------|
|                    | Low feed efficiency   | High feed efficiency |             |                              |                                   |
| SST                | 0                     | 45                   | DE, SEC     | Hypothalamus                 | Hypothalamus                      |
| SNORA73            | 41                    | 108                  | DE          | Liver                        | Liver                             |
| ENSBTAG00000047700 | 56                    | 111                  | DE          | Liver                        | Liver                             |
| ENSBTAG00000047121 | 62                    | 111                  | DE          | Liver                        | Liver                             |
| ENSBTAG00000047816 | 53                    | 96                   | DE          | Liver                        | Liver                             |
| ENSBTAG00000039928 | 50                    | 89                   | DE          | Liver                        | Liver                             |
| ANXA13             | 115                   | 63                   | DE          | Liver                        | Liver                             |
| FST                | 113                   | 56                   | DE          | Liver                        | Liver                             |
| PBLD               | 115                   | 55                   | DE          | Liver                        | Liver                             |
| ENSBTAG00000021368 | 95                    | 0                    | DE          | Liver                        | Liver                             |
| JCHAIN             | 52                    | 113                  | DE, SEC     | Liver                        | Liver                             |
| IGFBP1             | 55                    | 0                    | DE, TS, SEC | Liver                        | Liver                             |
| SBK2               | 0                     | 70                   | DE          | Muscle                       | Muscle                            |
| ACTC1              | 54                    | 0                    | DE          | Muscle                       | Muscle                            |
| MYH1               | 0                     | 47                   | DE, TS      | Muscle                       | Muscle                            |
| HR                 | 119                   | 50                   | DE          | Pituitary                    | Muscle                            |
| TAGLN              | 83                    | 31                   | DE          | Adrenal                      | Muscle, Pituitary                 |
| SFRP2              | 41                    | 91                   | DE          | Hypothalamus                 | Pituitary                         |
| FN1                | 119                   | 69                   | DE          | Liver                        | Pituitary                         |
| CAV1               | 98                    | 50                   | DE          | Muscle                       | Pituitary                         |

382 \*Differentially expresses genes between high and low feed efficiency (DE), tissue specific genes (TS) and genes  
 383 encoding proteins secreted in plasma (SEC).  
 384

385 Comparing the two networks there was no large difference regarding the number of  
 386 genes and connections. While high FE network contained 1,074 genes in total and 28,018  
 387 connections, low FE network was composed by 1,098 genes and 30,705 connections. For all  
 388 tissues, low FE networks showed more connections but the difference is slight, being the  
 389 bigger difference of 44 versus 40 connections per gene in liver.

390

## 391 Discussion

392 Feed efficiency is a complex trait, regulated by several biological processes. Thus, the  
 393 indication of genomic regions associated with this phenotype, as well as regulators genes and

394 biomarkers to select superior animals and to direct management decisions is still a great  
395 challenge. In this work, multi-tissue transcriptomic data of high and low feed efficient  
396 Nellore bulls were analysed through robust co-expression network methodologies in order to  
397 uncover some of the biology that governs this traits and put forward candidate genes to be  
398 focus of further research. In this sense, the validation of target genes of main transcription  
399 factors (key regulators) in the network by motif search proves the efficacy of the  
400 methodology for network construction and prioritizes some transcription factors as central  
401 regulators (Aerts *et al*, 2010; Naval-Sánchez *et al*, 2013; Potier *et al*, 2014). Moreover, the  
402 addition of a category of genes coding proteins secreted in plasma in the co-expression  
403 analysis highlight genes with potential to be explored as biomarkers of feed efficiency. We  
404 were able to identify genes related to main biological process associated with feed efficiency  
405 and indicate key regulators, as can be seen on the following lines.

406         Firstly, it is worthy to mention the 98 animals used to select the high and low FE  
407 groups in this study have been previously analysed regarding several phenotypic and  
408 molecular measures (Alexandre *et al*, 2015; Mota *et al*, 2017; Novais *et al*, 2018). It was  
409 observed high and low FE groups had similar body weight gain, carcass yield and loin eye  
410 area but low FE animals had higher feed intake, greater fat deposition, higher serum  
411 cholesterol levels, as well as hepatic inflammatory response, indicated by transcriptome  
412 analysis of liver biopsy and proved by the higher number of periportal mononuclear infiltrate  
413 (histopathology) and increased serum gamma-glutamyl-transferase (GGT, a biomarker of  
414 liver injury) in this group (Alexandre *et al*, 2015). In the present study, the simultaneous  
415 analysis of five distinct tissues revealed a prominence of the hepatic tissue. Liver presented  
416 the most connected genes in the network, the higher number of differentially connected genes  
417 and higher number of secreted genes, which although can be explained by its biological  
418 function, are enriched mostly for terms related to lipid homeostasis and inflammatory

419 response. Moreover, the top five most connected regulators in the network are co-expressed  
420 mainly with genes highly expressed in liver and also enriched for inflammatory response.

421 The relationship between FE and genes or pathways related to immune response and  
422 lipid metabolism is becoming more evident, as recent studies also reported it in beef cattle  
423 (Karisa *et al*, 2014; Weber *et al*, 2016; Paradis *et al*, 2015; Zarek *et al*, 2017; Mukiibi *et al*,  
424 2018) and pigs (Gondret *et al*, 2017; Ramayo-Caldas *et al*, 2018). In our previous work  
425 (Alexandre *et al*, 2015), we proposed increased liver lesions associated with higher  
426 inflammatory response in liver of low FE animals could be due to increased lipogenesis  
427 and/or higher bacterial infection in the liver. While further evidence is needed to test these  
428 hypotheses, the enrichment of terms such as induction of bacterial agglutination and response  
429 to lipopolysaccharide makes bacterial infection a strong possibility. Indeed, pigs with low FE  
430 were reported to have higher intestinal inflammation, neutrophil infiltration biomarkers and  
431 increased serum endotoxin (lipopolysaccharide and other bacterial products) which could be  
432 related to increased bacterial infection or to decreased capacity to neutralize endotoxins  
433 (Mani *et al*, 2013). The authors hypothesized differences in bacterial population could  
434 partially explain the increase in circulating endotoxins, which could also be true for cattle  
435 given that differences in intestinal and ruminal bacterial population between high and low FE  
436 animals have already been reported (Myer *et al*, 2015, 2016). Furthermore, the literature  
437 reports lipopolysaccharides (LPS) may cause up-regulation of adrenomedullin (*ADM*)  
438 hormone (Shindo *et al*, 1998), an up-regulated gene in low FE individuals as showed here. It  
439 was also demonstrated in rats that intravenous infusion of LPS caused up-regulation of *ADM*  
440 in ileum, liver, lung, aorta, skeletal muscle and blood vessels (Shoji *et al*, 1995) whereas in  
441 our study, *ADM* presented differential expression in muscle, but not in liver.

442 Against pathogen invasion, a tightly regulated adaptive immune response must be  
443 triggered in order to allow T lymphocytes to produce cytokines or chemokines and B cells to

444 differentiate and produce antibodies (Hermann-Kleiter & Baier, 2014). This regulation is  
445 known to be strongly influenced by the expression level and transcriptional activity of several  
446 nuclear receptors, including the NR2F-family, which consists of three orphan receptors:  
447 NR2F1, NR2F2 and NR2F6 (Hermann-Kleiter & Baier, 2014). Those receptors present  
448 highly conserved DNA and ligand binding domains among each other and across species  
449 (Pereira *et al*, 2000), and all three are expressed in adaptive and immune cells (Hermann-  
450 Kleiter & Baier, 2014). In our study, NR2F6 appeared as the second most connected  
451 regulator gene in the network while the other family members, although present in our  
452 expression data, were not selected by any of our inclusion criteria, thus indicating they might  
453 not be so relevant in our conditions. Indeed, NR2F6 appears to be a critical regulatory factor  
454 in the adaptive immune system by directly repressing the transcription of key cytokine genes  
455 in T effector cells (Hermann-Kleiter *et al*, 2008; Klepsch *et al*, 2016). The role of NR2F6 as a  
456 key regulator of inflammatory response in our network was validated at gene level by the  
457 identification of the binding motif HNF4-NR2F2 (transfac\_pro-M01031) as one of the most  
458 enriched in NR2F6 target genes, due to the high similarity between NR2F2 and NR2F6  
459 binding sites. Furthermore, using open chromatin data public available, we provided  
460 experimental evidence of the binding of TFs with highly similar binding motifs as NR2F6 in  
461 hepatocyte cells in humans and in cattle, thus, indicating predicted target enhancers are  
462 functional in this tissue.

463 Another regulator prioritized in our analysis is *TGFBI*, the sixth most connected gene  
464 in the co-expression network, and a potential driver of transcriptional changes between high  
465 and low FE cattle in muscle. This gene has been previously pointed as a master regulator of  
466 FE in beef cattle, using genomics and metabolomics data (Widmann *et al*, 2015). Moreover,  
467 our motif discovery analysis showed *TGFBI* co-expressed genes are mostly enriched for  
468 binding site of master regulators of muscle differentiation as *MEF2* and *MYOD*. Indeed,

469 public available data show many of *TGFBI* target genes were associated with *MYOD*  
470 (Mullen *et al*, 2011). It is known signalling pathways are an effective mechanism for cells to  
471 respond to environmental cues by regulation gene expression. *TGFBI* signalling triggers the  
472 phosphorylation of *SMAD2/3* transcription factors, which co-bind with cell-type master  
473 regulators at the nuclear level allowing/triggering/leading to cell-type specific transcriptional  
474 changes (Schmierer & Hill, 2007; Mullen *et al*, 2011). In skeletal muscle cells, myoblasts and  
475 myotubes, *SMAD3* co-binds with *MYOD1* (Mullen *et al*, 2011). The overlap between  
476 *MYOD1* and *SMAD3* target genes demonstrate the significant association between both genes  
477 in skeletal muscle, in agreement with the tissue-specificity *TGFBI* signalling response  
478 (Mullen *et al*, 2011). The overlap percentage between our predicted binding sites and  
479 *MYOD1* Chip-seq data (18 and 24.5%) confirms previous analysis in mice where they  
480 reported only 20% of experimental validated distal enhancers in mouse myotubes with a  
481 bHLH (MyoD1) binding were actually bound by *MYOD* ChIP-seq data (Blum *et al*. 2012).  
482 Thus, suggesting additional transcription-factors and/or histone modification have a key role  
483 in *MYOD1* binding. The *SMAD3/MYOD1* co-bound regions for known target genes are also  
484 captured, such as the promoter regions of *ACTA1* and *ANKRD1*, both genes involved in  
485 skeletal muscle differentiation (Figure 4C). We also demonstrated predicted *MYOD1* binding  
486 regions are enriched for muscle regulatory regions across species (human, mouse and cow).

487 Altogether, we showed co-expressed genes with *TGFBI* are enriched for  
488 *SMAD3/MYOD1* binding sites, which we validate at the gene and enhancer level by proving  
489 not only *MYOD1* and *SMAD3* binding, but also their accessibility, in human, mouse and cow.  
490 In pigs, it has been indicated increased feed efficiency is associated with stimulation of  
491 muscle growth through TGF- $\beta$  signalling pathway (Jing *et al*, 2015). Finally, although not  
492 directly co-expressed with *TGFBI*, oxytocin (*OXT*) was DE in muscle and despite the lack of  
493 knowledge on its role in this tissue, previous work in cattle have shown a massive increase of

494 *OXT* expression in muscle of bovines chronically exposed to anabolic steroids (Jager *et al*,  
495 2011). It is not known yet if oxytocin alone have an anabolic activity, but in a context where  
496 muscle growth seems to be associated with high FE animals, this is a hormone that worth  
497 further investigation.

498 From the 13 regulator genes that are DE between groups, six are involved in  
499 respiratory chain and are up-regulated in high FE group. Genes *ND1*, *ND4*, *ND4L*, *ND5*, *ND6*  
500 and *ND2*, which is DE but not identified as key regulator, are core subunits of the  
501 mitochondrial membrane respiratory chain Complex I (CI) which functions in the transfer of  
502 electrons from NADH to the respiratory chain, while *ATP8* is part of Complex V and  
503 produces ATP from ADP in the presence of the proton gradient across the membrane.  
504 Interestingly, greater quantity of mitochondrial CI protein were associated with high FE cattle  
505 by Ramos and Kerley (2013) whereas Davis *et al.* (2016) found higher CI-CII and CI-CIII  
506 concentration ratios for the same group. Other studies demonstrated high FE animals  
507 consume less oxygen (Chaves *et al*, 2015) and present lower plasma CO<sub>2</sub> concentrations,  
508 which suggests a decreased oxidation process (Gonano *et al*, 2014). In general, the literature  
509 suggests mitochondrial ADP has greater control of oxidative phosphorylation in high FE  
510 individuals (Lancaster *et al*, 2014) and their increased mitochondrial function may contribute  
511 to feed efficiency (Connor *et al*, 2010). In pigs, differences in mitochondrial function were  
512 reported when analysing muscle (Vincent *et al*, 2015), blood (Liu *et al*, 2016) and adipose  
513 tissue transcriptomes (Louveau *et al*, 2016). Differences in metabolic rate associated with FE  
514 has long been discussed (Herd & Arthur, 2009) and here is corroborated by the up-regulation  
515 of *TSHB* in high FE animals, which stimulates production of T<sub>3</sub> and T<sub>4</sub> in thyroid thus  
516 increasing metabolism. It is inhibited by *SST*, a down-regulated hormone in this group which  
517 was also found to be differentially connected between high and low FE.

518           Looking at the DE genes, many hormones can be identified. Hormones are signalling  
519 proteins that are transported by the circulatory system to target distant organs in order to  
520 regulate physiology. Regarding the relationship between FE and other production traits of  
521 economic importance, *FSHB*, responsible for spermatozoa production by activating Sertoli  
522 cells in the testicles (Walker & Cheng, 2005), is up-regulated in low FE group and is  
523 inhibited by follistatin (*FST*), a gene found to be down-regulated in the same group.  
524 Moreover, in rats, it was already demonstrated *FSH* secretion is stimulated by somatostatin  
525 expression, which is up-regulated in low FE animals (Kitaoka *et al*, 1989). In this scenario,  
526 one could argue that selection for high FE delay reproduction traits, something that could be  
527 related to the lower fat deposition in this group, as previously observed (Alexandre *et al*,  
528 2015; Santana *et al*, 2012; Gomes *et al*, 2012). Indeed, differences in body composition and  
529 in intermediary metabolism can impact on reproductive traits (Shaffer *et al*, 2011) and it has  
530 been observed before that feed efficient bulls present features of delayed sexual maturity, i.e.  
531 decreased progressive motility of the sperm and higher abundance of tail abnormalities  
532 (Montanholi *et al*, 2016; Fontoura *et al*, 2016). Moreover, high FE heifers presented less fat  
533 deposition and later sexual maturity which results in calving later in the calving season than  
534 their low FE counterparts (Randel & Welsh, 2013; Shaffer *et al*, 2011). It is important to  
535 point that low FE animals also present down-regulation of *AMH* and the fall of this hormone  
536 in serum was pointed as an excellent marker of Sertoli cells pubertal development (Rey *et al*,  
537 1993).

538           Concerning the differences in lipid metabolism in divergent FE phenotypes, *FGF21*, a  
539 hormone up-regulated in liver of high FE animals, is associated in humans to decrease in  
540 body weight, blood triglycerides and LDL-cholesterol, with improvement in insulin  
541 sensitivity (Cheung & Deng, 2014). It is an hepatokine released to the bloodstream and an  
542 important regulator of lipid and glucose metabolism (Giralt *et al*, 2015). When we select its



543 first neighbours in the network and perform an enrichment analysis we indeed found terms  
544 related to plasma lipoprotein particle remodelling, regulation of lipoprotein oxidation and  
545 cholesterol efflux mostly due to *FGF21* co-expression with the apolipoproteins *APOA4*,  
546 *APOC3* and *APOM*. In the same context, pro-melanin-concentrating hormone (*PMCH*)  
547 encodes three neuropeptides: neuropeptide-glycine-glutamic acid, neuropeptide-glutamic  
548 acid-isoleucine and melanin-concentrating hormone (*MCH*) being the last one the most  
549 extensively studied (Helgeson & Schmutz, 2008). *MCH* up-regulation has been related to  
550 obesity and insulin resistance, as well as increased appetite and reduced metabolism in  
551 murine models (Ludwig *et al*, 2001; Ito *et al*, 2003). *PMCH* gene is up-regulated in low FE  
552 animals and harbour SNPs found to be associated with higher carcass fat levels and marbling  
553 score (Walter *et al*, 2014; Helgeson & Schmutz, 2008).

554 In this work, we were able to identify several biological processes known to be related  
555 to feed efficiency, which together with the validation of the main transcription factors of the  
556 network, demonstrate the quality of the data and the robustness of the analyses, giving us the  
557 confidence to indicate candidate genes to be regulators or biomarkers of superior animals for  
558 this trait. The transcription factors NR2F6 and TGFB1 play central roles in liver and muscle,  
559 respectively, by regulating genes related to inflammatory response and muscle development  
560 and growth, two main biological mechanisms associated to feed efficiency. Likewise,  
561 hormones and other proteins secreted in plasma as oxytocin, adrenomedulin, TSH,  
562 somatostatin, follistatin and AMH are interesting molecules to be explored as potential  
563 biomarkers of feed efficiency.

564

## 565 **Material and methods**

### 566 **Phenotypic data and biological sample collection**

567 All animal protocols were approved by the Institutional Animal Care and Use  
568 Committee of Faculty of Food Engineering and Animal Sciences, University of São Paulo  
569 (FZEA-USP – protocol number 14.1.636.74.1). All procedures to collect phenotypes and  
570 biological samples were carried out at FZEA-USP, Pirassununga, State of São Paulo, Brazil.  
571 Ninety eight Nellore bulls (16 to 20 months old and  $376 \pm 29$  kg BW) were evaluated in a  
572 feeding trial comprised of 21 days of adaptation to feedlot diet and place and a 70-day period  
573 of data collection. Total mixed ration was offered *ad libitum* and daily dry matter intake  
574 (DMI) was individually measured. Animals were weighted at the beginning, at the end and  
575 every 2 weeks during the experimental period. Feed efficiency was estimated by residual feed  
576 intake (RFI) which is the residual of the linear regression that estimates DMI based on  
577 average daily gain and mid-test metabolic body weight (Koch *et al*, 1963). Forty animals  
578 selected either as high feed efficiency (HFE) or low feed efficiency (LFE) groups were  
579 slaughtered on two days with a 6-day interval. Adrenal gland, hypothalamus, liver, muscle  
580 and pituitary samples were collected from each animal, rapidly frozen in liquid nitrogen and  
581 stored at  $-80$  °C. Further information about management and phenotypic measures of the  
582 animals used in this study can be found in Alexandre et al. (2015).

583

#### 584 **RNAseq data generation**

585 Samples of nine animals from each feed efficiency group (high and low) were  
586 selected for RNAseq using RFI measure. For hypothalamus and pituitary, the nitrogen frozen  
587 tissue was macerated with crucible and pistil and stored in aliquots at  $-80$  °C. Then, RNA was  
588 extracted using AllPrep DNA/RNA/Protein Mini kit (QIAGEN, Crawley, UK). For liver,  
589 muscle and adrenal gland, a cut was made in the frozen tissue and the RNA was extracted  
590 using RNeasy Mini Kit (QIAGEN, Crawley, UK). RNA quality and quantity were assessed  
591 using automated capillary gel electrophoresis on a Bioanalyzer 2100 with RNA 6000 Nano

592 Labchips according to the manufacturer's instructions (Agilent Technologies Ireland, Dublin,  
593 Ireland). Samples that presented an RNA integrity number (RIN) less than 8.0 were  
594 discarded.

595 RNA libraries were constructed using the TruSeq™ Stranded mRNA LT Sample Prep  
596 Protocol and sequenced on Illumina HiSeq 2500 equipment in a HiSeq Flow Cell v4 using  
597 HiSeq SBS Kit v4 (2x100pb). Liver, pituitary and hypothalamus were sequenced on the same  
598 run, each one in a different lane. Muscle and adrenal gland were sequenced in a second run,  
599 in different lanes.

600

### 601 **Gene expression estimation**

602 The quality of the sequencing was evaluated using the software FastQC  
603 (<http://www.bioinformatics.babraham.ac.uk/projects/fastqc/>). Sequence alignment against the  
604 bovine reference genome (UMD3.1) was performed using STAR (Dobin *et al*, 2013),  
605 according to the standard parameters and including the annotation file (Ensembl release 89)  
606 and secondary alignments, duplicated reads and reads failing vendor quality checks were  
607 removed using Samtools (Li *et al*, 2009). Then, HTseq (Anders *et al*, 2014) was used to  
608 generate gene read counts and expression values were estimated by reads per kilobase of gene  
609 per million mapped reads (RPKM). Genes with average value lower than 0.2 FPKM across  
610 all samples and tissues were discarded.

611 Gene expression normalization was performed using the following mixed effect  
612 model (Reverter *et al*, 2005):

$$Y_{ijkl} = \mu + L_i + G_j + GT_{jk} + GP_{jl} + e_{ijkl}$$

613 where the log2-transformed FPKM value for i-th library (86 levels), j-th gene (17,354 levels),  
614 k-th tissue (5 levels), l-th RFI phenotype (2 levels), corresponding to  $Y_{ijkl}$ , was modelled as a  
615 function of the fixed effect of library ( $L_i$ ) and the random effects of gene ( $G_j$ ), gene by tissue

616 ( $GT_{jk}$ ) and gene by RFI phenotype ( $GP_{ji}$ ). Random residual ( $e_{ijkl}$ ) was assumed to be  
617 independent and identically distributed. Variance component estimates and solutions to the  
618 model were obtained using VCE6 (Eildert Groeneveld, Milena Kovac and Norbert Mielenz,  
619 <ftp://ftp.tzv.fal.de/pub/vce6/doc/vce6-manual-3.1-A4.pdf>). Normalized mean expression  
620 (NME) values for each gene were defined as the linear combination of the solutions for  
621 random effects.

622 The mixed model used to normalize the expression data explained 96% of the  
623 variation in gene expression, of which the largest proportion (0.30) was due to tissue-  
624 specificity. Contrariwise, differences between high and low FE represented no variation  
625 ( $0.27E-11$ ). For that reason, normalized mean expression (NME) were only used to identify  
626 tissue specific genes and the raw FPKM values were used for differential expression and co-  
627 expression analysis.

628

## 629 **Gene selection for network construction**

630 In order to select a set of relevant genes for network analysis, we defined five  
631 categories based on the following inclusion criteria:

632 1. Differential expression (DE) - The mean expression value of each gene, for  
633 each group (high and low FE) and each tissue was calculated and then the expression of low  
634 FE group was subtracted from the expression in high FE group. Next, genes were ranked  
635 according to their mean expression in all samples for each tissue and divided in five bins.  
636 Genes were considered differentially expressed when the difference between the expression  
637 in high and low FE groups were greater than 3.1 or smaller than -3.1 standard deviation from  
638 the mean in each bin, corresponding to a t-test  $P < 0.001$ .

639 2. Harboursing SNPs - Genes harboursing SNPs associated with feed efficiency,  
640 mainly indicated by GWAS, were identified using PubMed database

641 ([www.ncbi.nlm.nih.gov/pubmed/](http://www.ncbi.nlm.nih.gov/pubmed/)) and AnimalQTL database ([www.animalgenome.org/cgi-](http://www.animalgenome.org/cgi-bin/QTLdb/index)  
642 [bin/QTLdb/index](http://www.animalgenome.org/cgi-bin/QTLdb/index)) and only bovine data were considered regardless of breed.

643 3. Tissue specific (TS) - A gene was considered as tissue specific when the  
644 average NME in that tissue was greater than one standard deviation from the mean of all  
645 genes AND the average NME in all the other four tissues was smaller than zero.

646 4. Secreted - The human secretome database  
647 ([www.proteinatlas.org/humanproteome/secretome](http://www.proteinatlas.org/humanproteome/secretome)) was used to select genes encoding  
648 proteins secreted in plasma by any of the analysed tissues (adrenal gland, hypothalamus,  
649 liver, muscle and pituitary).

650 5. Key regulators - In order to identify key regulatory genes to be included in the  
651 co-expression network, a list of genes were obtained from the Animal Transcription Factor  
652 Database (<http://www.bioguo.org/AnimalTFDB/>) and it was compared to a set of potential  
653 target genes in each tissue, composed by the categories: TS, DE, harbouring SNPs and  
654 secreted. The analysis was based on regulatory impact factor metrics (Reverter *et al*, 2010),  
655 which comprises a set of two metrics designed to assign scores to regulator genes consistently  
656 differentially co-expressed with target genes and to those with the most altered ability to  
657 predict the abundance of target genes. Those scores deviating  $\pm 1.96$  standard deviation from  
658 the mean (corresponding to  $P < 0.05$ ) were considered significant. Genes presenting mean  
659 expression value less than the mean of all genes expressed were not considered in this  
660 analysis.

661 Some of the genes selected by the categories above were represented by more than  
662 one ensemble ID. Those duplications were removed for further analysis, keeping only the  
663 expression value of the most meaningful ensemble ID. Additionally, genes with mean  
664 expression across the samples equal to zero were also removed from further analysis.

665

## 666 **Co-expression network analysis**

667 For gene network inference, genes selected by the five categories described  
668 previously were used as nodes and significant connections (edges) between them were  
669 identified using partial correlation and information theory (PCIT) algorithm (Reverter &  
670 Chan, 2008), considering all animals and all tissues. PCIT determinates the significance of  
671 the correlation between two nodes after accounting for all the other nodes in the network. The  
672 output of PCIT was visualized on Cytoscape (Shannon *et al*, 2003).

673

## 674 **Network validation through transcription factor binding motifs analysis**

675 Using the regulatory impact factor metric (RIF) we prioritize key regulator genes  
676 from gene expression data and predict target genes based on co-expression network (PCIT).  
677 In order to assess whether those target genes were enriched for motifs associated to the top  
678 most connected regulators in the network with a DNA binding domain (transcription factors -  
679 TF), we performed motif discovery analysis in the set of co-expressed target genes (first  
680 neighbours of the TF) using i-cistarget method (Herrmann *et al*, 2012) and i-Regulon, a  
681 Cytoscape plug-in (Janky *et al*, 2014). These tools use human (hg19) as the reference species,  
682 therefore only genes with human orthology are assessed. Then, to validate the binding of the  
683 identified genomic regions by the TFs, we performed a region enrichment analysis across  
684 experimentally available TF bound regions from ChiP-seq in cell lines from the ENCODE  
685 consortium (1,394 TF binding site tracks). Finally, we converted identified enhancer regions  
686 to cow coordinates and searched for regions of open-chromatin using data from a public  
687 available studies in cow tissues.

688

## 689 **Differential connectivity**

690 In order to explore differentially connected genes between high and low FE, two  
691 networks were created, one for each condition, using the same methodology described before.  
692 Then, the number of connections of each gene in each condition was computed and scaled so  
693 that connectivity varied from 0 to 1, making possible to compare the same gene in the two  
694 networks. The connectivity in high RFI group was subtracted from the connectivity in low  
695 RFI group and results deviating  $\pm 1.96$  standard deviation from the mean were considered  
696 significant ( $P < 0.05$ ).

697

## 698 **Functional Enrichment**

699 Functional enrichment analysis was performed on the online platform GOrilla (Gene  
700 Ontology enRiChment anaLysis and visuaLizAtion tool, <http://cbl-gorilla.cs.technion.ac.il/>),  
701 using all genes that passed FPKM filter as background, hypergeometric test and multiple test  
702 correction (FDR - false discovery rate). The human database was used to take advantage of a  
703 more comprehensive knowledge regarding gene functions. GO terms were considered  
704 significant when  $P_{adj} < 0.05$ . For genes in co-expression networks, visualized using Cytoscape  
705 (Shannon *et al*, 2003), the functional enrichment was performed with BiNGO plug-in (Maere  
706 *et al*, 2005) using the same background genes and statistical test.

707

## 708 **Acknowledgments**

709 The authors thank Mrs. Elisângela C. M. Oliveira for all technical support. This study  
710 and PAA scholarships were funded by São Paulo Research Foundation (FAPESP) - Proc.  
711 2014/07566-2, 2015/22276-3 and 2017/14707-0. M.N.S was funded by the CSIRO Science  
712 Excellence Research Office.

713

714 **Conflict of interest**

715 The authors declare that they have no conflict of interest.

716

717 **Author contributions**

718 HF was the overall project leader who conceived this study and supervised PAA in all data  
719 generation. TR performed the network analysis and supervised PAA in bioinformatics and  
720 data interpretation. MNS performed the motif discovery analysis. LRPN and JBSF provided  
721 informatics and statistical support. All authors contributed to and approved the final version  
722 of this manuscript.

723

724 **Availability of supporting data**

725 Datasets supporting the results of this article is public available in the European Nucleotide  
726 Archive (ENA) as part of FAANG consortium under de study ID PRJEB27337 and can be  
727 accessed following the link <https://www.ebi.ac.uk/ena/data/view/PRJEB27337>.

728

729 **References**

- 730 Aerts S, Quan XJ, Claeys A, Sanchez MN, Tate P, Yan J & Hassan BA (2010) Robust target  
731 gene discovery through transcriptome perturbations and genome-wide enhancer  
732 predictions in drosophila uncovers a regulatory basis for sensory specification. *PLoS*  
733 *Biol.* **8**:  
734 Alexandre P a., Kogelman LJ a., Santana MH a., Passarelli D, Pulz LH, Fantinato-Neto P,  
735 Silva PL, Leme PR, Strefezzi RF, Coutinho LL, Ferraz JBS, Eler JP, Kadarmideen HN  
736 & Fukumasu H (2015) Liver transcriptomic networks reveal main biological processes  
737 associated with feed efficiency in beef cattle. *BMC Genomics* **16**: 1073 Available at:  
738 <http://www.biomedcentral.com/1471-2164/16/1073>  
739 Anders S, Pyl PT & Huber W (2014) HTSeq - A Python framework to work with high-  
740 throughput sequencing data. *Bioinformatics* **31**: 166–9 Available at:  
741 [http://www.pubmedcentral.nih.gov/articlerender.fcgi?artid=4287950&tool=pmcentrez&](http://www.pubmedcentral.nih.gov/articlerender.fcgi?artid=4287950&tool=pmcentrez&rendertype=abstract)  
742 [rendertype=abstract](http://www.pubmedcentral.nih.gov/articlerender.fcgi?artid=4287950&tool=pmcentrez&rendertype=abstract) [Accessed September 29, 2014]  
743 Archer JA, Arthur PF, Herd RM, Parnell PF & Pitchford WS (1997) Optimum postweaning  
744 test for measurement of growth rate, feed intake, and feed efficiency in British breed  
745 cattle. *J. Anim. Sci.* **75**: 2024–32 Available at:  
746 <http://www.ncbi.nlm.nih.gov/pubmed/9263047> [Accessed September 5, 2014]  
747 Archer JA, Richardson EC, Herd RM & Arthur PF (1999) Potential for selection to improve



- 748 efficiency of feed use in beef cattle: a review. *Aust. J. Agric. Res.* **50**: 147–61 Available  
749 at: <http://www.publish.csiro.au/paper/A98075.htm> [Accessed February 29, 2016]
- 750 Bolormaa S, Hayes BJ, Savin K, Hawken R, Barendse W, Arthur PF, Herd RM & Goddard  
751 ME (2011) Genome-wide association studies for feedlot and growth traits in cattle. *J.*  
752 *Anim. Sci.* **89**: 1684–97 Available at: <http://www.ncbi.nlm.nih.gov/pubmed/21239664>  
753 [Accessed March 21, 2012]
- 754 Cafe LM, Robinson DL, Ferguson DM, Geesink GH & Greenwood PL (2011) Temperament  
755 and hypothalamic-pituitary-adrenal axis function are related and combine to affect  
756 growth, efficiency, carcass, and meat quality traits in Brahman steers. *Domest. Anim.*  
757 *Endocrinol.* **40**: 230–40 Available at:  
758 <http://www.sciencedirect.com/science/article/pii/S0739724011000063> [Accessed  
759 February 21, 2016]
- 760 Cao P, Hanai J-I, Tanksale P, Imamura S, Sukhatme VP & Lecker SH (2009) Statin-induced  
761 muscle damage and atrogen-1 induction is the result of a geranylgeranylation defect.  
762 *FASEB J.* **23**: 2844–2854 Available at:  
763 <http://www.ncbi.nlm.nih.gov/pubmed/19406843> [http://www.fasebj.org/content/23/  
764 9/2844.full.pdf](http://www.fasebj.org/content/23/9/2844.full.pdf)
- 765 Chaves AS, Nascimento ML, Tullio RR, Rosa AN, Alencar MM & Lanna DP (2015)  
766 Relationship of efficiency indices with performance, heart rate, oxygen consumption,  
767 blood parameters, and estimated heat production in Nellore steers. *J. Anim. Sci.* **93**:  
768 5036–46 Available at: <http://www.ncbi.nlm.nih.gov/pubmed/26523596> [Accessed  
769 February 28, 2016]
- 770 Chen L, Mao F, Crews DH, Vinsky M & Li C (2014) Phenotypic and genetic relationships of  
771 feeding behavior with feed intake, growth performance, feed efficiency, and carcass  
772 merit traits in Angus and Charolais steers. *J. Anim. Sci.* **92**: 974–83 Available at:  
773 <http://www.ncbi.nlm.nih.gov/pubmed/24492561> [Accessed February 21, 2016]
- 774 Cheung BM & Deng HB (2014) Fibroblast growth factor 21: a promising therapeutic target  
775 in obesity-related diseases. *Expert Rev Cardiovasc Ther* **12**: 659–666
- 776 Connor EE, Kahl S, Elsasser TH, Parker JS, Li RW, Van Tassell CP, Baldwin RL & Barao  
777 SM (2010) Enhanced mitochondrial complex gene function and reduced liver size may  
778 mediate improved feed efficiency of beef cattle during compensatory growth. *Funct.*  
779 *Integr. Genomics* **10**: 39–51 Available at:  
780 <http://www.ncbi.nlm.nih.gov/pubmed/19777276> [Accessed February 28, 2016]
- 781 Davis MP, Brooks MA & Kerley MS (2016) Relationship between residual feed intake and  
782 lymphocyte mitochondrial complex protein concentration and ratio in crossbred steers.  
783 *J. Anim. Sci.* **94**: 1587–1591
- 784 Dobin A, Davis CA, Schlesinger F, Drenkow J, Zaleski C, Jha S, Batut P, Chaisson M &  
785 Gingeras TR (2013) STAR: ultrafast universal RNA-seq aligner. *Bioinformatics* **29**: 15–  
786 21 Available at: <http://www.ncbi.nlm.nih.gov/pubmed/23104886> [Accessed February  
787 17, 2017]
- 788 Fontoura ABP, Montanholi YR, Diel de Amorim M, Foster RA, Chenier T & Miller SP  
789 (2016) Associations between feed efficiency, sexual maturity and fertility-related  
790 measures in young beef bulls. *Animal* **10**: 96–105 Available at:  
791 <http://www.ncbi.nlm.nih.gov/pubmed/26351012> [Accessed March 2, 2016]
- 792 Foote AP, Tait RG, Keisler DH, Hales KE & Freetly HC (2016) Leptin concentrations in  
793 finishing beef steers and heifers and their association with dry matter intake, average  
794 daily gain, feed efficiency, and body composition. *Domest. Anim. Endocrinol.* **55**: 136–  
795 41 Available at: <http://www.sciencedirect.com/science/article/pii/S0739724016000035>  
796 [Accessed April 15, 2016]
- 797 Francisco CL, Resende FD, Benatti JMB, Castilhos AM, Cooke RF & Jorge AM (2015)

- 798 Impacts of temperament on Nellore cattle: physiological responses, feedlot performance,  
799 and carcass characteristics. *J. Anim. Sci.* **93**: 5419 Available at:  
800 <http://www.ncbi.nlm.nih.gov/pubmed/26641061> [Accessed February 21, 2016]
- 801 Gerber PJ, Steinfeld H, Henderson B, Mottet A, Opio C, Dijkman J, Falcucci A & Tempio G  
802 (2013) Tackling Climate Change Through Livestock - A Global Assessment of  
803 Emissions and Mitigation Opportunities Rome Available at:  
804 <http://www.fao.org/docrep/018/i3437e/i3437e.pdf>
- 805 Giralt M, Gavaldà-Navarro A & Villarroya F (2015) Fibroblast growth factor-21, energy  
806 balance and obesity. *Mol. Cell. Endocrinol.* **418**: 66–73
- 807 Gomes RC, Sainz RD, Silva SL, César MC, Bonin MN & Leme PR (2012) Feedlot  
808 performance, feed efficiency reranking, carcass traits, body composition, energy  
809 requirements, meat quality and calpain system activity in Nellore steers with low and  
810 high residual feed intake. *Livest. Sci.* **150**: 265–273 Available at:  
811 <http://www.sciencedirect.com/science/article/pii/S1871141312003587> [Accessed  
812 February 19, 2014]
- 813 Gonano C, Montanholi Y, Schenkel F, Smith B, Cant J & Miller S (2014) The relationship  
814 between feed efficiency and the circadian profile of blood plasma analytes measured in  
815 beef heifers at different physiological stages. *Animal* **8**: 1684–1698 Available at:  
816 <http://www.ncbi.nlm.nih.gov/pubmed/24923431> [Accessed February 28, 2016]
- 817 Gondret F, Vincent A, Houée-Bigot M, Siegel A, Lagarrigue S, Causeur D, Gilbert H &  
818 Louveau I (2017) A transcriptome multi-tissue analysis identifies biological pathways  
819 and genes associated with variations in feed efficiency of growing pigs. *BMC Genomics*  
820 **18**: 1–17
- 821 Hayes BJ, Lewin H a & Goddard ME (2013) The future of livestock breeding: genomic  
822 selection for efficiency, reduced emissions intensity, and adaptation. *Trends Genet.* **29**:  
823 206–14 Available at: <http://www.ncbi.nlm.nih.gov/pubmed/23261029> [Accessed  
824 October 15, 2014]
- 825 Helgeson SC & Schmutz SM (2008) Genetic variation in the pro-melanin-concentrating  
826 hormone gene affects carcass traits in *Bos taurus* cattle. *Anim. Genet.* **39**: 310–315
- 827 Herd RM & Arthur PF (2009) Physiological basis for residual feed intake. *J. Anim. Sci.* **87**:  
828 E64-71 Available at: [http://jas.fass.org/cgi/content/abstract/87/14\\_suppl/E64](http://jas.fass.org/cgi/content/abstract/87/14_suppl/E64) [Accessed  
829 March 28, 2012]
- 830 Herd RM, Oddy VH & Richardson EC (2004) Biological basis for variation in residual feed  
831 intake in beef cattle. 1. Review of potential mechanisms. *Aust. J. Exp. Agric.* **44**: 423  
832 Available at:  
833 [http://www.publish.csiro.au/view/journals/dsp\\_journal\\_fulltext.cfm?nid=72&f=EA0222  
834 0](http://www.publish.csiro.au/view/journals/dsp_journal_fulltext.cfm?nid=72&f=EA02220) [Accessed April 18, 2012]
- 835 Hermann-Kleiter N & Baier G (2014) Orphan nuclear receptor NR2F6 acts as an essential  
836 gatekeeper of Th17 CD4+ T cell effector functions. *Cell Commun. Signal.* **12**: 1–12
- 837 Hermann-Kleiter N, Gruber T, Lutz-Nicoladoni C, Thuille N, Fresser F, Labi V,  
838 Schiefermeier N, Warnecke M, Huber L, Villunger A, Eichele G, Kaminski S & Baier G  
839 (2008) The Nuclear Orphan Receptor NR2F6 Suppresses Lymphocyte Activation and T  
840 Helper 17-Dependent Autoimmunity. *Immunity* **29**: 205–216
- 841 Herrmann C, Van De Sande B, Potier D & Aerts S (2012) i-cisTarget: An integrative  
842 genomics method for the prediction of regulatory features and cis-regulatory modules.  
843 *Nucleic Acids Res.* **40**:
- 844 Ito M, Gomori A, Ishihara A, Oda Z, Mashiko S, Matsushita H, Yumoto M, Ito M, Sano H,  
845 Tokita S, Moriya M, Iwaasa H & Kanatani A (2003) Characterization of MCH-mediated  
846 obesity in mice. *Am. J. Physiol. - Endocrinol. Metab.* **284**: E940–E945
- 847 Jager N De, Hudson NJ, Reverter A, Wang Y, Nagaraj SH, Cafe LM, Greenwood PL,

- 848 Barnard RT, Kongsuwan KP, Dalrymple BP, Pl G, Rt B, Kp K & Bp D (2011) Chronic  
849 exposure to anabolic steroids induces the muscle expression of oxytocin and a more than  
850 fiftyfold increase in circulating oxytocin in cattle. : 467–478
- 851 Janky R, Verfaillie A, Imrichová H, van de Sande B, Standaert L, Christiaens V, Hulselmans  
852 G, Hertzen K, Naval Sanchez M, Potier D, Svetlichnyy D, Kalender Atak Z, Fiers M,  
853 Marine JC & Aerts S (2014) iRegulon: From a Gene List to a Gene Regulatory Network  
854 Using Large Motif and Track Collections. *PLoS Comput. Biol.* **10**:  
855 Jing L, Hou Y, Wu H, Miao Y, Li X, Cao J, Brameld JM, Parr T & Zhao S (2015)  
856 Transcriptome analysis of mRNA and miRNA in skeletal muscle indicates an important  
857 network for differential Residual Feed Intake in pigs. *Sci. Rep.* **5**: 11953 Available at:  
858 [http://www.pubmedcentral.nih.gov/articlerender.fcgi?artid=4493709&tool=pmcentrez&](http://www.pubmedcentral.nih.gov/articlerender.fcgi?artid=4493709&tool=pmcentrez&rendertype=abstract)  
859 [rendertype=abstract](http://www.pubmedcentral.nih.gov/articlerender.fcgi?artid=4493709&tool=pmcentrez&rendertype=abstract) [Accessed April 6, 2016]
- 860 Karisa B, Moore S & Plastow G (2014) Analysis of biological networks and biological  
861 pathways associated with residual feed intake in beef cattle. *Anim. Sci. J.* **85**: 374–87  
862 Available at: <http://www.ncbi.nlm.nih.gov/pubmed/24373146> [Accessed February 1,  
863 2015]
- 864 Kelly AK, McGee M, Crews DH, Fahey AG, Wylie AR & Kenny DA (2010) Effect of  
865 divergence in residual feed intake on feeding behavior, blood metabolic variables, and  
866 body composition traits in growing beef heifers. *J. Anim. Sci.* **88**: 109–23 Available at:  
867 <http://www.ncbi.nlm.nih.gov/pubmed/19820067> [Accessed February 21, 2016]
- 868 Kitaoka M, Takano K, Kojima I & Ogata E (1989) A stimulatory effect of somatostatin:  
869 Enhancement of activin A-mediated FSH secretion in rat pituitary cells. *Biochem.*  
870 *Biophys. Res. Commun.* **162**: 958–962
- 871 Klepsch V, Hermann-Kleiter N & Baier G (2016) Beyond CTLA-4 and PD-1: Orphan  
872 nuclear receptor NR2F6 as T cell signaling switch and emerging target in cancer  
873 immunotherapy. *Immunol. Lett.* **178**: 31–36
- 874 Koch RM, Swiger LA, Chambers D & Gregory KE (1963) Efficiency of Feed Use in Beef  
875 Cattle. *J. Anim. Sci.* **22**: 486–494
- 876 de la Fuente A (2010) From ‘differential expression’ to ‘differential networking’ -  
877 identification of dysfunctional regulatory networks in diseases. *Trends Genet.* **26**: 326–  
878 33 Available at: <http://www.ncbi.nlm.nih.gov/pubmed/20570387> [Accessed July 18,  
879 2014]
- 880 Lancaster PA, Carstens GE, Michal JJ, Brennan KM, Johnson KA & Davis ME (2014)  
881 Relationships between residual feed intake and hepatic mitochondrial function in  
882 growing beef cattle. *J. Anim. Sci.* **92**: 3134–41 Available at:  
883 <http://www.ncbi.nlm.nih.gov/pubmed/24894006> [Accessed February 29, 2016]
- 884 Li H, Handsaker B, Wysoker A, Fennell T, Ruan J, Homer N, Marth G, Abecasis G & Durbin  
885 R (2009) The Sequence Alignment/Map format and SAMtools. *Bioinformatics* **25**:  
886 2078–9 Available at:  
887 [http://www.pubmedcentral.nih.gov/articlerender.fcgi?artid=2723002&tool=pmcentrez&](http://www.pubmedcentral.nih.gov/articlerender.fcgi?artid=2723002&tool=pmcentrez&rendertype=abstract)  
888 [rendertype=abstract](http://www.pubmedcentral.nih.gov/articlerender.fcgi?artid=2723002&tool=pmcentrez&rendertype=abstract) [Accessed July 9, 2014]
- 889 Liu D, Black BL & Derynck R (2001) TGF-beta inhibits muscle differentiation through  
890 functional repression of myogenic transcription factors by Smad3. *Genes Dev.* **15**:  
891 2950–2966
- 892 Liu H, Nguyen YT, Nettleton D, Dekkers JCM & Tuggle CK (2016) Post-weaning blood  
893 transcriptomic differences between Yorkshire pigs divergently selected for residual feed  
894 intake. *BMC Genomics* **17**: 73 Available at:  
895 [http://www.pubmedcentral.nih.gov/articlerender.fcgi?artid=4724083&tool=pmcentrez&](http://www.pubmedcentral.nih.gov/articlerender.fcgi?artid=4724083&tool=pmcentrez&rendertype=abstract)  
896 [rendertype=abstract](http://www.pubmedcentral.nih.gov/articlerender.fcgi?artid=4724083&tool=pmcentrez&rendertype=abstract) [Accessed February 1, 2016]
- 897 Louveau I, Vincent A, Tacher S, Gilbert H & Gondret F (2016) Increased expressions of

- 898 genes and proteins involved in mitochondrial oxidation and antioxidant pathway in  
899 adipose tissue of pigs selected for a low residual feed intake. *J. Anim. Sci.* **94**: 5042–  
900 5054
- 901 Ludwig DS, Tritos NA, Mastaitis JW, Kulkarni R, Kokkotou E, Elmquist J, Lowell B, Flier  
902 JS & Maratos-Flier E (2001) Melanin-concentrating hormone overexpression in  
903 transgenic mice leads to obesity and insulin resistance. *J. Clin. Invest.* **107**: 379–386
- 904 Mader CJ, Montanholi YR, Wang YJ, Miller SP, Mandell IB, McBride BW & Swanson KC  
905 (2009) Relationships among measures of growth performance and efficiency with  
906 carcass traits, visceral organ mass, and pancreatic digestive enzymes in feedlot cattle. *J.*  
907 *Anim. Sci.* **87**: 1548–57 Available at: <http://www.ncbi.nlm.nih.gov/pubmed/18952722>  
908 [Accessed January 30, 2015]
- 909 Maere S, Heymans K & Kuiper M (2005) BiNGO: A Cytoscape plugin to assess  
910 overrepresentation of Gene Ontology categories in Biological Networks. *Bioinformatics*  
911 **21**: 3448–3449
- 912 Mani V, Harris AJ, Keating AF, Weber TE, Dekkers JCM & Gabler NK (2013) Intestinal  
913 integrity, endotoxin transport and detoxification in pigs divergently selected for residual  
914 feed intake. *J. Anim. Sci.* **91**: 2141–50 Available at:  
915 <http://www.ncbi.nlm.nih.gov/pubmed/23463550> [Accessed March 1, 2016]
- 916 Montanholi YR, Fontoura ABP, Diel de Amorim M, Foster RA, Chenier T & Miller SP  
917 (2016) Seminal plasma protein concentrations vary with feed efficiency and fertility-  
918 related measures in young beef bulls. *Reprod. Biol.* **16**: 147–156
- 919 Montanholi YR, Swanson KC, Palme R, Schenkel FS, McBride BW, Lu D & Miller SP  
920 (2010) Assessing feed efficiency in beef steers through feeding behavior, infrared  
921 thermography and glucocorticoids. *Animal* **4**: 692–701 Available at:  
922 <http://www.ncbi.nlm.nih.gov/pubmed/22444121> [Accessed February 29, 2016]
- 923 Montanholi YR, Swanson KC, Schenkel FS, McBride BW, Caldwell TR & Miller SP (2009)  
924 On the determination of residual feed intake and associations of infrared thermography  
925 with efficiency and ultrasound traits in beef bulls. *Livest. Sci.* **125**: 22–30 Available at:  
926 <http://www.sciencedirect.com/science/article/pii/S1871141309000766> [Accessed  
927 February 29, 2016]
- 928 Mota LFM, Bonafé CM, Alexandre PA, Santana MH, Novais FJ, Toriyama E, Pires AV, da  
929 Luz Silva S, Leme PR, Ferraz JBS & Fukumasu H (2017) Circulating leptin and its  
930 muscle gene expression in Nellore cattle with divergent feed efficiency. *J. Anim. Sci.*  
931 *Biotechnol.* **8**:
- 932 Mukiihi R, Vinsky M, Keogh KA, Fitzsimmons C, Stothard P, Waters SM & Li C (2018)  
933 Transcriptome analyses reveal reduced hepatic lipid synthesis and accumulation in more  
934 feed efficient beef cattle. : 1–12
- 935 Mullen AC, Orlando DA, Newman JJ, Lovén J, Kumar RM, Bilodeau S, Reddy J, Guenther  
936 MG, Dekoter RP & Young RA (2011) Master transcription factors determine cell-type-  
937 specific responses to TGF- $\beta$  signaling. *Cell* **147**: 565–576
- 938 Myer PR, Smith TPL, Wells JE, Kuehn LA & Freetly HC (2015) Rumen microbiome from  
939 steers differing in feed efficiency. *PLoS One* **10**: e0129174 Available at:  
940 [http://www.pubmedcentral.nih.gov/articlerender.fcgi?artid=4451142&tool=pmcentrez&](http://www.pubmedcentral.nih.gov/articlerender.fcgi?artid=4451142&tool=pmcentrez&rendertype=abstract)  
941 [rendertype=abstract](http://www.pubmedcentral.nih.gov/articlerender.fcgi?artid=4451142&tool=pmcentrez&rendertype=abstract) [Accessed March 1, 2016]
- 942 Myer PR, Wells JE, Smith TPL, Kuehn LA & Freetly HC (2016) Microbial community  
943 profiles of the jejunum from steers differing in feed efficiency. *J. Anim. Sci.* **94**: 327  
944 Available at: <http://www.ncbi.nlm.nih.gov/pubmed/26812338> [Accessed March 27,  
945 2017]
- 946 Naval-Sánchez M, Potier D, Haagen L, Sánchez M, Munck S, Van De Sande B, Casares F,  
947 Christiaens V & Aerts S (2013) Comparative motif discovery combined with

- 948 comparative transcriptomics yields accurate targetome and enhancer predictions.  
949 *Genome Res.* **23**: 74–88
- 950 Nkrumah JD, Keisler DH, Crews DH, Basarab JA, Wang Z, Li C, Price MA, Okine EK &  
951 Moore SS (2007) Genetic and phenotypic relationships of serum leptin concentration  
952 with performance, efficiency of gain, and carcass merit of feedlot cattle. *J. Anim. Sci.*  
953 **85**: 2147–55 Available at: <http://www.ncbi.nlm.nih.gov/pubmed/17468416> [Accessed  
954 February 23, 2016]
- 955 Novais FJ, Pires PRL, Alexandre PA, Dromms RA, Iglesias AH, Ferraz JBS, Styczynski MP  
956 & Fukumasu H (2018) Serum metabolomics predicts biological processes associated to  
957 feed efficiency in beef cattle [under review]. *Sci. Rep.*
- 958 de Oliveira PSN, Cesar ASM, do Nascimento ML, Chaves AS, Tizioto PC, Tullio RR, Lanna  
959 DPD, Rosa AN, Sonstegard TS, Mourao GB, Reecy JM, Garrick DJ, Mudadu MA,  
960 Coutinho LL & Regitano LCA (2014) Identification of genomic regions associated with  
961 feed efficiency in Nelore cattle. *BMC Genet.* **15**: 100 Available at:  
962 <http://www.biomedcentral.com/1471-2156/15/100> [Accessed December 27, 2014]
- 963 Paradis F, Yue S, Grant JR, Stothard P, Basarab JA & Fitzsimmons C (2015) Transcriptomic  
964 analysis by RNA sequencing reveals that hepatic interferon-induced genes may be  
965 associated with feed efficiency in beef heifers. *J. Anim. Sci.* **93**: 3331 Available at:  
966 <http://www.ncbi.nlm.nih.gov/pubmed/26440002> [Accessed November 8, 2015]
- 967 Pereira FA, Tsai MJ & Tsai SY (2000) COUP-TF orphan nuclear receptors in development  
968 and differentiation. *Cell Mol Life Sci* **57**: 1388–1398
- 969 Potier D, Davie K, Hulselmans G, NavalSanchez M, Haagen L, Huynh-Thu VA, Koldere D,  
970 Celik A, Geurts P, Christiaens V & Aerts S (2014) Mapping Gene Regulatory Networks  
971 in Drosophila Eye Development by Large-Scale Transcriptome Perturbations and Motif  
972 Inference. *Cell Rep.* **9**: 2290–2303
- 973 Ramayo-Caldas Y, Ballester M, Sánchez JP, González-Rodríguez O, Revilla M, Reyer H,  
974 Wimmers K, Torrallardona D & Quintanilla R (2018) Integrative approach using liver  
975 and duodenum RNA-Seq data identifies candidate genes and pathways associated with  
976 feed efficiency in pigs. *Sci. Rep.* **8**:
- 977 Ramos MH & Kerley MS (2013) Mitochondrial complex I protein differs among residual  
978 feed intake phenotype in beef cattle. *J. Anim. Sci.* **91**: 3299–304 Available at:  
979 <http://www.ncbi.nlm.nih.gov/pubmed/23798519> [Accessed February 29, 2016]
- 980 Randel RD & Welsh TH (2013) Joint Alpharma-Beef Species Symposium: interactions of  
981 feed efficiency with beef heifer reproductive development. *J. Anim. Sci.* **91**: 1323–8  
982 Available at: <http://www.ncbi.nlm.nih.gov/pubmed/23048157> [Accessed March 2, 2016]
- 983 Reverter A, Barris W, McWilliam S, Byrne KA, Wang YH, Tan SH, Hudson N & Dalrymple  
984 BP (2005) Validation of alternative methods of data normalization in gene co-expression  
985 studies. *Bioinformatics* **21**: 1112–1120
- 986 Reverter A & Chan EKF (2008) Combining partial correlation and an information theory  
987 approach to the reversed engineering of gene co-expression networks. *Bioinformatics*  
988 **24**: 2491–2497 Available at: <http://www.ncbi.nlm.nih.gov/pubmed/18784117> [Accessed  
989 June 11, 2017]
- 990 Reverter A, Hudson NJ, Nagaraj SH, Pérez-Enciso M & Dalrymple BP (2010) Regulatory  
991 impact factors: Unraveling the transcriptional regulation of complex traits from  
992 expression data. *Bioinformatics* **26**: 896–904
- 993 Rey R, Lordereau-Richard I, Carel JC, Barbet P, Cate RL, Roger M, Chaussain JL & Josso N  
994 (1993) Anti-müllerian hormone and testosterone serum levels are inversely during  
995 normal and precocious pubertal development. *J. Clin. Endocrinol. Metab.* **77**: 1220–  
996 1226
- 997 Rolf MM, Taylor JF, Schnabel RD, McKay SD, McClure MC, Northcutt SL, Kerley MS &

- 998 Weaber RL (2011) Genome-wide association analysis for feed efficiency in Angus  
999 cattle. *Anim. Genet.* Available at: <http://www.ncbi.nlm.nih.gov/pubmed/22497295>  
1000 [Accessed April 24, 2012]
- 1001 Santana MHA, Rossi P, Almeida R & Cucco DC (2012) Feed efficiency and its correlations  
1002 with carcass traits measured by ultrasound in Nellore bulls. *Livest. Sci.* **145**: 252–257  
1003 Available at: <http://linkinghub.elsevier.com/retrieve/pii/S1871141312000686> [Accessed  
1004 January 13, 2015]
- 1005 Santana MH, Utsunomiya YT, Neves HH, Gomes RC, Garcia JF, Fukumasu H, Silva SL,  
1006 Oliveira Junior G a, Alexandre P a, Leme PR, Brassaloti R a, Coutinho LL, Lopes TG,  
1007 Meirelles F V, Eler JP & Ferraz JB (2014) Genome-wide association analysis of feed  
1008 intake and residual feed intake in Nellore cattle. *BMC Genet.* **15**: 21 Available at:  
1009 <http://www.ncbi.nlm.nih.gov/pubmed/24517472> [Accessed February 19, 2014]
- 1010 Schmierer B & Hill CS (2007) TGF $\beta$ -SMAD signal transduction: Molecular specificity and  
1011 functional flexibility. *Nat. Rev. Mol. Cell Biol.* **8**: 970–982
- 1012 Seabury CM, Oldeschulte DL, Saatchi M, Beaver JE, Decker JE, Halley YA, Bhattarai EK,  
1013 Molaei M, Freetly HC, Hansen SL, Yampara-Iquise H, Johnson KA, Kerley MS, Kim  
1014 JW, Loy DD, Marques E, Neiberghs HL, Schnabel RD, Shike DW, Spangler ML, et al  
1015 (2017) Genome-wide association study for feed efficiency and growth traits in U.S. beef  
1016 cattle. *BMC Genomics* **18**:
- 1017 Shaffer KS, Turk P, Wagner WR & Felton EED (2011) Residual feed intake, body  
1018 composition, and fertility in yearling beef heifers. *J. Anim. Sci.* **89**: 1028–34 Available  
1019 at: <http://www.ncbi.nlm.nih.gov/pubmed/21112981> [Accessed March 2, 2016]
- 1020 Shannon P, Markiel A, Ozier O, Baliga NS, Wang JT, Ramage D, Amin N, Schwikowski B  
1021 & Ideker T (2003) Cytoscape: A software Environment for integrated models of  
1022 biomolecular interaction networks. *Genome Res.* **13**: 2498–2504
- 1023 Shin JH, Li RW, Gao Y, Baldwin VI R & Li CJ (2012) Genome-wide ChIP-seq mapping and  
1024 analysis reveal butyrate-induced acetylation of H3K9 and H3K27 correlated with  
1025 transcription activity in bovine cells. *Funct. Integr. Genomics* **12**: 119–130
- 1026 Shindo T, Kurihara H, Kurihara Y, Morita H & Yazaki Y (1998) Upregulation of endothelin-  
1027 1 and adrenomedullin gene expression in the mouse endotoxin shock model. *J*  
1028 *Cardiovasc Pharmacol* **31 Suppl 1**: S541-4
- 1029 Shoji H, Minamino N, Kangawa K & Matsuo H (1995) Endotoxin markedly elevates plasma  
1030 concentration and gene transcription of adrenomedullin in rat. *Biochem. Biophys. Res.*  
1031 *Commun.* **215**: 531–537
- 1032 Swami M (2009) Networking complex traits. *Nat. Rev. Genet.* **10**: 2566
- 1033 Tronche F & Yaniv M (1992) HNF1, a homeoprotein member of the hepatic transcription  
1034 regulatory network. *BioEssays* **14**: 579–587
- 1035 Villar D, Berthelot C, Aldridge S, Rayner TF, Lukk M, Pignatelli M, Park TJ, Deaville R,  
1036 Erichsen JT, Jasinska AJ, Turner JMA, Bertelsen MF, Murchison EP, Flicek P & Odom  
1037 DT (2015) Enhancer evolution across 20 mammalian species. *Cell* **160**: 554–566
- 1038 Vincent A, Louveau I, Gondret F, Tréfeu C, Gilbert H & Lefaucheur L (2015) Divergent  
1039 selection for residual feed intake affects the transcriptomic and proteomic profiles of pig  
1040 skeletal muscle. *J. Anim. Sci.* **93**: 2745–58 Available at:  
1041 <http://www.ncbi.nlm.nih.gov/pubmed/26115262> [Accessed February 29, 2016]
- 1042 Walker WH & Cheng J (2005) FSH and testosterone signaling in Sertoli cells. *Reproduction*  
1043 **130**: 15–28
- 1044 Walter LJ, Gasch CA, Mcevers TJ, Hutcheson JP, Defoor P, Marquess FLS & Lawrence TE  
1045 (2014) Association of pro-melanin concentrating hormone genotype with beef carcass  
1046 quality and yield. *J. Anim. Sci.* **92**: 325–331
- 1047 Weber KL, Welly BT, Van Eenennaam AL, Young AE, Port-Neto LR, Reverter A & Rincon

1048 G (2016) Identification of Gene networks for residual feed intake in Angus cattle using  
1049 genomic prediction and RNA-seq. *PLoS One* **11**: 1–19  
1050 Widmann P, Reverter A, Weikard R, Suhre K, Hammon HM, Albrecht E & Kuehn C (2015)  
1051 Systems biology analysis merging phenotype, metabolomic and genomic data identifies  
1052 Non-SMC Condensin I Complex, Subunit G (NCAPG) and cellular maintenance  
1053 processes as major contributors to genetic variability in Bovine feed efficiency. *PLoS*  
1054 *One* **10**: 1–22  
1055 Zarek CM, Lindholm-Perry AK, Kuehn LA & Freetly HC (2017) Differential expression of  
1056 genes related to gain and intake in the liver of beef cattle. *BMC Res. Notes* **10**: 1  
1057 Available at: <http://www.ncbi.nlm.nih.gov/pubmed/28057050> [Accessed March 27,  
1058 2017]  
1059  
1060  
1061  
1062

1063 **Supporting data**

1064

1065 **S1 Supporting Information. Information of reads mapping to bovine genome (UMD3.1)**  
1066 **per sample.**

1067

1068 **S2 Supporting Information. Scatter plots showing differentially expressed genes**  
1069 **between high and low feed efficiency (FE) from adrenal gland, hypothalamus, liver,**  
1070 **muscle and pituitary.** Dots represent the mean expression for a gene in high FE subtracted  
1071 from the mean expression of the same gene in low FE (M) by the average expression value in  
1072 both groups (A). Pink dots represent significant genes ( $P < 0.001$ ).

1073

1074 **S3 Supporting Information. Differentially expressed genes between high and low feed**  
1075 **efficiency in adrenal gland (A), hypothalamus (B), liver (C), muscle (D) and pituitary**  
1076 **(E).**

1077

1078 **S4 Supporting Information. Functional enrichment of the 248 genes down-regulated in**  
1079 **high feed efficiency considering the five tissues (adrenal gland, hypothalamus, liver,**  
1080 **muscle and pituitary).** Colour intensity increase with the significance of the term; white  
1081 represents  $P > 10^{-3}$  and the darkest orange represents  $P < 10^{-9}$ .

1082

1083 **S5 Supporting Information. Genes selected for network construction for being**  
1084 **differentially expressed between high and low feed efficiency (A), harbouring SNPs**  
1085 **previously associated with feed efficiency (B), tissue specific (C), coding proteins**  
1086 **secreted in plasma (D) and key regulators (E).**

1087

1088 **S6 Supporting Information. Functional enrichment for the 135 genes coding proteins**  
1089 **secreted in plasma which the tissue of maximum expression is liver.** Colour intensity  
1090 increase with the significance of the term; white represents  $P > 10^{-3}$  and the darkest orange  
1091 represents  $P < 10^{-9}$ .

1092

1093 **S7 Supporting Information. Genes included in co-expression analysis.**

1094

1095 **S8 Supporting Information. Top five key regulator genes network and enrichment. A)**  
1096 **Network of genes *EPC1*, *NR2F6*, *MED21*, *ENSBTAG00000031687* and *CTBP1* and their**  
1097 **first neighbours.** Nodes with diamond shape correspond to secreted proteins coding genes  
1098 and triangles correspond to key regulators; all the other genes are represented by ellipses.  
1099 Nodes with black borders are differentially expressed between high and low feed efficiency.  
1100 Colours are relative to the tissue of maximum expression: blue represent liver, red represent  
1101 muscle, yellow represent pituitary, green represent hypothalamus and orange represent  
1102 adrenal gland. The size of the nodules is relative to the normalized mean expression values in  
1103 all samples. Only correlations above 0.9 and below -0.9 and its respective genes are shown  
1104 in this figure. **B) Functional enrichment of the 345 genes in the network (A).** Colour  
1105 intensity increase with the significance of the term; white represents  $P > 5 \times 10^{-3}$ .

1106

1107 **S9 Supporting Information. *TGFBI* network and enrichment. A) Network of *TGFBI***  
1108 **gene and its first neighbours.** Nodes with diamond shape correspond to secreted proteins  
1109 coding genes and triangles correspond to key regulators; all the other genes are represented  
1110 by ellipses. Nodes with black borders are differentially expressed between high and low feed  
1111 efficiency. Colours are relative to the tissue of maximum expression: blue represent liver, red  
1112 represent muscle, yellow represent pituitary, green represent hypothalamus and orange



1113 represent adrenal gland. The size of the nodules is relative to the normalized mean expression  
1114 values in all samples. Only correlations above 0.9 and below -0.9 and its respective genes are  
1115 shown in this figure. **B) Functional enrichment of the 157 genes in the network (A).**  
1116 Colour intensity increase with the significance of the term; white represents  $P > 5 \times 10^{-3}$ .

1117

1118 **S10 Supporting Information. FGF21 network and enrichment. A) Network of FGF21**  
1119 **gene and its first neighbours.** Nodes with diamond shape correspond to secreted proteins  
1120 coding genes and triangles correspond to key regulators; all the other genes are represented  
1121 by ellipses. Nodes with black borders are differentially expressed between high and low feed  
1122 efficiency. Colours are relative to the tissue of maximum expression: blue represent liver, red  
1123 represent muscle, yellow represent pituitary, green represent hypothalamus and orange  
1124 represent adrenal gland. The size of the nodules is relative to the normalized mean expression  
1125 values in all samples. Only correlations above 0.9 and below -0.9 and its respective genes are  
1126 shown in this figure. **B) Functional enrichment of the 98 genes in the network (A).** Colour  
1127 intensity increase with the significance of the term; white represents  $P > 5 \times 10^{-3}$ .

1128

1129 **S11 Supporting Information. NR2F6 i-cis Target results.**

1130

1131 **S12 Supporting Information. NR2F6 predicted regions binding hg19.**

1132

1133 **S13 Supporting Information. NR2F6 predicted regions binding bosTau.**

1134

1135 **S14 Supporting Information. TGBF1 i-cis Target results.**

1136

1137 **S15 Supporting Information. MYOD predicted transcription factors binding sites in**  
1138 **hg19.**

1139

1140 **S16 Supporting Information. MYOD predicted transcription factors binding sites in**  
1141 **mm8.**

1142

1143 **S17 Supporting Information. MYOD predicted transcription factors binding sites in**  
1144 **mm9.**

1145

1146 **S18 Supporting Information. MYOD predicted transcription factors binding sites in**  
1147 **bosTau6.**

1148

1149 **S19 Supporting Information. Differentially connected genes between high and low feed**  
1150 **efficiency.**

1151

1152 **S20 Supporting Information. Functional enrichment for the 87 differentially co-**  
1153 **expressed genes between high and low feed efficiency.** Colour intensity increase with the  
1154 significance of the term; white represents  $P > 10^{-3}$  and the darkest orange represents  $P < 10^{-9}$ .

1155

1156
